1

1

2 Contrasting effects of aging on the expression of transposons, the piRNA machinery and  
3 mitochondrial transcripts in the *Drosophila* ovary

4

5 Alexandra A. Erwin

6 Justin P. Blumenstiel

7

8 Department of Ecology and Evolutionary Biology

9 University of Kansas

10 Lawrence, KS 66045 USA

11

12 Correspondence: [alekserwin417@gmail.com](mailto:alekserwin417@gmail.com), [jblumens@ku.edu](mailto:jblumens@ku.edu)

13

14

15

16

17

18

19

20

21

22

23

24

25

26

27

28

29

30 ABSTRACT

31

32 Redistribution of heterochromatin during aging has been linked to the de-repression of transposable  
33 elements and an overall loss of gene regulation in the soma. Whether or not epigenetic factors such as  
34 heterochromatin marks are perturbed in reproductive and germline tissues is of particular interest because  
35 some epigenetic factors are known to transmit across generations. Additionally, the relative contribution  
36 of factors intrinsic or extrinsic to the germ line have in reproductive decline remains unknown. Using  
37 mRNA sequencing data from late stage egg chambers in *Drosophila melanogaster*, we show that age-  
38 related expression changes occur in genes residing in heterochromatin, particularly on the largely  
39 heterochromatic 4<sup>th</sup> chromosome. In addition, we identify an increase in expression of the piRNA  
40 machinery. We further identify a striking age-related reduction in mitochondrial transcripts that we can  
41 attribute to the somatic tissues. Other than a modest increase in overall TE expression in the aging  
42 germline, we find no global TE de-repression in reproductive tissues. Rather, the observed effects of  
43 aging on TEs are primarily strain and family specific. These results indicate unique responses in somatic  
44 versus germline tissue with regards to epigenetic aging effects and suggest that the global loss of TE  
45 control observed in other studies may be specific to certain tissues, genetic backgrounds and TE family.  
46 This study also demonstrates that while age-related effects can be maternally transmitted, the germline is  
47 generally robust to age-related changes.

48

49

50

51

52

53

54

## 55 INTRODUCTION

56

57 The age-related decline of the reproductive system has important consequences for evolution because  
58 reproductive success determines the fitness of an organism. Since the majority of aging studies focus on  
59 overall somatic decline, relatively little is known about the causes of reproductive aging. In humans,  
60 progressive delays in childbearing are leading more people to confront the reduced fertility and fecundity  
61 that accompanies advanced age (Billari et al., 2007; Dunson et al., 2002). Reproductive senescence is not  
62 unique to mammals, however. The invertebrate model *Drosophila melanogaster* shows a progressive  
63 decline in egg production at middle age, thought to be partially caused by a reduction in germline stem  
64 cell proliferation and decreased survival of developing eggs (Zhao et al., 2008). Possible mechanisms  
65 underlying these changes include reduced ovariole number, decreased rates in germline stem cell division,  
66 and apoptosis in egg chambers of older females (Pan et al., 2007; Zhao et al., 2008). Animals may have  
67 conserved mechanisms to regulate reproductive decline and control the relationship between reproduction  
68 and lifespan. Not only have mechanisms of gametogenesis been found to be similar across organisms, but  
69 the control of ovulation has also been shown to be conserved between *Drosophila* and humans (Sun and  
70 Spradling, 2013). Because *Drosophila* is an established model for studies of both reproductive and  
71 somatic aging, we used it here to examine age-related genome-wide expression changes in the germline  
72 and broader reproductive tissues.

73

74 While genetic causes have long been shown to determine longevity - through either inherited or somatic  
75 mutation, non-genetic contributions are also proving to be major factors. Epigenetic chromatin marks play  
76 an essential role in the maintenance of genome integrity through their repression of genes, repeat  
77 sequences, and transposable elements (reviewed by (Putiri and Robertson, 2011). The misregulation of  
78 epigenetic marks has been associated with many diseases, including kidney disease, neurodegenerative

79 diseases, and cancer (Figuroa-Romero et al., 2012; Muntean and Hess, 2009; Smyth et al., 2014).  
80 Recently, epigenetic mis-regulation has been attributed to playing a key role in the aging process. In  
81 particular, the landscape of silent heterochromatin has been shown to redistribute in aged stem cells and  
82 cells of the soma, leading to aberrant gene expression (Bell et al., 2012; De Cecco, 2013a; Jiang, 2013;  
83 Larson et al., 2012; Shah et al., 2013; Wood et al., 2010). An additional consequence of this redistribution  
84 of heterochromatin is the observed de-repression of transposable elements in the soma during aging,  
85 notably in brains and fat body of *Drosophila*, and in a variety of other organisms including mammals  
86 (Chen et al., 2016; De Cecco, 2013b; Li et al., 2013; Maxwell et al., 2011; Patterson et al., 2015).  
87 Although interesting for the biology of aging, somatic cells do not affect future generations. Surprisingly,  
88 little is known about whether epigenetic changes occur in aged reproductive tissues and germline cells  
89 that may transmit these non-genetic but potentially heritable effects to the next generation.

90

91 The germ line is considered an immortal cell lineage. Thus, germ cells have unique strategies to faithfully  
92 transmit DNA indefinitely, such as greater telomerase maintenance (Wright et al., 1996) and greater  
93 resistance to genotoxic stress than somatic cells (Vinoth et al., 2008). However, age-related changes in the  
94 germline are known to occur. For example, some germ cells lose the ability to divide and differentiate  
95 normally (Zhao et al., 2008), the sperm of older human males are thought to be at risk for more de novo  
96 mutations based on parent-offspring mutations (Kong et al., 2012), and double strand break repair in  
97 oocytes in humans and mice declines with age (Titus et al., 2013). Additionally, age-dependent meiotic  
98 nondisjunction may be due to a loss of the protein complex that regulates the separation of sister  
99 chromatids over time (Subramanian and Bickel, 2008). However, some age-effects that have been  
100 observed in the germline may be due to extrinsic factors such as the microenvironment of the germ line  
101 stem cells (Boyle et al., 2007; Pan et al., 2007; Zhao et al., 2008). The relative roles of extrinsic versus  
102 intrinsic factors in contributing to germline aging are still being explored. In mammals, much of the  
103 current evidence points to a greater role of cell-extrinsic factors. Similar to flies, niche deterioration also

104 may play a role in the mammalian system (Zhang et al., 2006). For example, it has been shown that  
105 mammalian spermatogonial stem cells, when transplanted to a young environment, have extended  
106 functionality (Ryu et al., 2006; Schmidt et al., 2011). Signaling factors like insulin may also play a role in  
107 maintaining germline function in mammals (Hsu and Drummond-Barbosa, 2008; Yang et al., 2013).  
108 Thus, while the germline is generally considered to be immortal, components of the germline and its  
109 microenvironment are not immune to age-related changes.

110

111 Recent findings highlighting the large role of epigenetic changes in the aging process leads us to question  
112 whether similar mechanisms may also be at play in reproductive tissues. Although the majority of  
113 epigenetic marks are erased and re-established between generations, some epigenetic modifications are  
114 transmitted across generations through the germline. Longevity itself is a trait that has been shown to be  
115 epigenetically inherited in *C. elegans* (Greer et al., 2016; Greer et al., 2011; Spracklin et al., 2017). Of  
116 most relevance, *Drosophila* oocytes transmit the repressive histone mark H3K27me3 to their offspring  
117 (Zenk et al., 2017). This creates a potential for age-effects to be passed on to the next generation, an  
118 outcome that could pose new questions for traditional evolutionary aging theories that have been around  
119 for decades.

120

121 Few studies have characterized genome-wide, age-related expression in ovaries and we are not aware of  
122 any such studies in the *Drosophila* germline. We sought to determine whether age-related epigenetic  
123 changes occur in the germline and broader *Drosophila* reproductive tissues using mRNA expression as a  
124 proxy. Specifically, we asked whether the age-dependent transposable element release extends to the  
125 ovary by determining whether transposable elements were derepressed during aging. We further tested the  
126 heterochromatin aging hypothesis by testing whether genes in or near heterochromatin boundaries were  
127 aberrantly expressed, and if genes were globally misregulated in reproductive tissues. We find that gene

128 expression changes are enriched in heterochromatic regions of the genome, but the direction of change is  
129 not consistent with a global increase in expression of heterochromatin. Further, we only find idiosyncratic  
130 aging effects on TE expression and no global increase in expression. These results suggest that the age-  
131 related transposon release and the heterochromatin aging hypothesis do not extend to the *Drosophila*  
132 ovary in a simple manner.

## 133 METHODS

134

### 135 Fly stocks

136

137 *D. melanogaster* DGRP lines 237 and 321 were utilized for this study and maintained at 22 degrees  
138 Celsius and 12 hour light cycles.

### 139 Egg Chamber Tissue Collection

140

141 Flies were maintained in bottles at controlled larval density (~100 per bottle) for two generations before  
142 tissue collections. Zero to one day old F2 females were transferred to individual vials for aging treatment  
143 and supplemented with two males ranging from 3-7 days old approximately every seven days to  
144 encourage egg production. Flies were moved to fresh vials weekly. Stage 14 egg chambers were dissected  
145 from ovaries of 3-4 and 32-34 day old females in PBS buffer. Using a thinly bristled paintbrush, 2-5 egg  
146 chambers from each female were added to single caps of .2mL tubes, stabbed with RNase free needles in  
147 30uL TRIzol, and flash frozen in liquid nitrogen.

### 148 Embryo Tissue Collection

149

150 Embryos were collected from the Ral-321 strain only. Flies were maintained in bottles at controlled larval  
151 density (~100 per bottle) for two generations. F2 females were maintained continuously laying in bottles  
152 containing yeast paste and supplemented with younger males. For embryo collections, flies were moved

153 to mating cages with petri dishes filled with fly food and ~5mL of yeast paste to acclimate overnight.  
154 Embryos were plucked from food plates after approximately 45 minutes of laying. Embryos were rinsed  
155 with embryo wash (0.7%NaCl, 0.05% Triton X-100) and dipped into 50% bleach using a mesh net for  
156 30s-1min followed by another rinse with embryo wash. Embryos were picked up with a thinly bristled  
157 brush and put into a TRIzol filled .2mL tube cap and flash frozen in liquid nitrogen.

#### 158 RNA extraction and mRNA Sequencing

159  
160 For RNA extraction, egg chambers from 5 females (~20 egg chambers total) were pooled. In total there  
161 were 5 pools for each age treatment across both strains. For embryos, ~20 embryos from each cage were  
162 pooled with 4 cages across two timepoints. Accounting for the TRIzol already in the samples from the  
163 collection stage, we added up to a total volume of 300uL TRIzol for RNA extractions. To improve  
164 recovery in the separation phase, we used 5PRIME Phase Lock Gel Heavy tubes. RNA was resuspended  
165 in 25uL of H2O. Library preps were performed using the NEBNext Ultra Kit according to the  
166 manufacturer's instructions (New England Biolabs). NEBNext Ultra libraries were pooled in groups of 8-  
167 10 per lane, and run with single-end 100 bp reads on a HiSeq 2500.

168

#### 169 Analysis of mRNA sequencing data

170  
171 RNA-seq was performed in CLC Genomics Workbench 8 using release 6 of the *Drosophila melanogaster*  
172 reference genome. For expression values, RPKM estimates generated by the RNA-seq tool in CLC  
173 Genomics Workbench were used. FDR-adjusted p-values for significant differential expression were  
174 calculated with a CLC algorithm based on the DESeq2 package in Bioconductor (Love et al., 2014). To  
175 estimate TE family expression, an annotated TE library was included in the RNAseq analysis while the  
176 rest of the genome was masked for individual TE sequences. GO analysis was performed with GOrilla

177 (Eden et al., 2009) using *D. melanogaster* orthologs genes sorted by FDR p-value for the test of treatment  
178 effect.

## 179 RESULTS

180

### 181 Genic transcripts differentially expressed with age in egg chambers of both strains

182

183 A number of studies have compared aging transcriptomes across tissues and even across species  
184 (Doroszuk, 2012; Lee, 1999; McCarroll et al., 2004; Pletcher, 2002; Zhan et al., 2007; Zou et al., 2000).  
185 Fewer studies, however, compare profiles in more than one natural strain (Highfill et al., 2016; Landis et  
186 al., 2004). Here we sought to determine how gene expression is modulated in the aging ovary in two  
187 different inbred Raleigh strains of *Drosophila melanogaster* obtained from the DGRP (Mackay et al.,  
188 2012). Since ovaries are highly heterogeneous, consisting of a mixture of somatic tissues, germline-stem  
189 cells and many different stages of oogenesis, we focused our RNAseq analysis using stage 14 egg  
190 chambers. This allowed us to minimize variation of cell type composition and to enrich for age-effects in  
191 the germline. Stage 14 egg chambers consist of an oocyte surrounded by a follicular sheath and represent  
192 the last stage of oogenesis before fertilization and oviposition. To measure differences in gene expression,  
193 we compared expression profiles in stage 14 egg chambers from mothers at 3-4 and 32-34 days post-  
194 eclosion (sample overview presented in Table 1). Overall, we identified 300 transcripts that were  
195 differentially expressed (DE) between young and old stage-14 egg chamber samples in a combined  
196 analysis with the two Raleigh lines (FDR adjusted p-value <.05), testing for age while controlling for  
197 strain in DESeq2.

198

199 Of the DE transcripts identified in the combined analysis, 106 transcripts show an average increase with  
200 age, while 194 show an average decrease with age across strains (Fig. 3.1A). Figure 3.1B demonstrates  
201 that the significantly differentially expressed transcripts are strongly correlated and show the same



202 direction of expression changes between old and young egg chambers across the two strains (Pearson's  
203 product-moment correlation = 0.66, p-value < 2e-16). Seven of these genes have previously been  
204 associated with regulation of lifespan. Notably, *hebe* (CG1623) overexpression increases both longevity  
205 and fecundity (Li and Tower, 2009) and *Hsp27* overexpression increases lifespan (Wang et al., 2004).  
206 Both of these transcripts showed average lower expression in older stage-14 egg chambers across the two  
207 strains (*hebe*: 4.11-fold decrease, FDR p-value < .1.28E-05; *Hsp27*: 1.6-fold decrease; FDR p-value  
208 <.006). *Hsp27* was also one of the most highly expressed genes (26th). Another gene, *POSH* (Plenty of  
209 SH3s, CG4909) has been shown to promote cell survival in both *Drosophila* and human cells when  
210 overexpressed (Tsuda et al., 2010). We find that this transcript shows a 1.46-fold increase with age in egg  
211 chambers (FDR adjusted p-value<4.05E-05). The other transcripts previously associated with regulation  
212 of lifespan include Thiolase (CG4581), Thor (CG8846), Coq2 (Coenzyme Q biosynthesis protein 2;  
213 CG9613), and Tpi (triose phosphate isomerase; CG2171). Other notable categories of gene ontology  
214 analysis using GOrilla (Eden et al., 2009) results for biological process by rank significance include terms  
215 pertaining to the electron transport chain (GO:0022900; GO:0022904), mitochondrial electron transport  
216 chain (GO:0006120), numerous metabolic processes, developmental and cellular processes involved in  
217 reproduction (GO:0003006; GO:0022412), eggshell chorion assembly (GO:0007306), many terms related  
218 to regulation of mitochondrial organization and fusion, determinant of adult life span (GO:0008340) and  
219 interestingly, miRNA metabolic process (GO:0010586). Full results from a gene ontology (GO) analysis  
220 for biological process, component, and function by rank significance is shown in Supplementary Table  
221 3.1.

222

223 While these DE transcripts may provide a signature of senescence for egg chambers, the transcriptome, as  
224 a whole, shows only a very weak correlation in age-related patterns of expression across these two strains  
225 (Pearson's product-moment correlation = 0.04, p-value < 1.8e-06, Figure 3.1B). This demonstrates that

226 many observed changes in gene expression in the aging ovary are likely to be strain specific. In fact, 59  
227 genes show a significant strain by age effect in our analysis.

228

229

230 Egg chamber transcripts from the mitochondrial genome are significantly downregulated with age across  
231 both strains

232

233 Some sets of genes and gene pathways show consistent and concerted changes with age across various  
234 studies. Age-related changes in the expression of mitochondrial genes and genes associated with the  
235 electron transport chain have consistently been reported. This is most commonly observed as a decrease  
236 during aging (Andreu, 1998; Calleja, 1993; Fernandez-Silva SP, 1991; Girardot et al., 2006; Morel, 1995;  
237 Sohal et al., 2008). In particular, this pattern has been observed in transcripts associated with the  
238 mitochondrial electron transport chain in the gonads of mice (Sharov et al., 2008).

239

240 In stage 14 egg chambers, 11 transcripts from the mitochondrial genome significantly decreased with age  
241 in the DE analysis (Figure 3.1, Figure 3.2A). Nine of those transcripts also showed a significant strain by  
242 age effect, with greater age-related fold-changes observed in Ral\_321 for seven transcripts, while two  
243 showed opposite age-related effects across the strains (Fig 3.2A). In addition to transcripts from the  
244 mitochondrial genome, we also found nuclear transcripts associated with the electron transport chain  
245 significantly enriched in a gene ontology analysis (Supp. Table 3.1). All of these nuclear transcripts were  
246 also downregulated with age in both strains (Fig. 3.2B). The downregulation of mitochondrial transcripts  
247 and those associated with the electron transport chain is in line with established mitochondrial  
248 dysfunction associated with age. Our finding lends support to decreased expression of mitochondrial  
249 transcripts being a general feature of aging across all tissue types but also highlights strain-specific

250 discrepancies in the magnitude of mitochondrial age-related effects. The reduced expression of  
251 mitochondrial transcripts in reproductive tissues may be especially significant as this could contribute to  
252 the reduced oocyte quality seen in aged flies (Calleja, 1993; Girardot et al., 2006; Morel, 1995; Sohal et  
253 al., 2008) and humans (Johnson et al., 2007; Zhang et al., 2017).

254

255 Downregulation of egg shell chorion transcripts in aged egg chambers show both shared and strain-  
256 specific effects

257

258 We found a significant gene ontology (GO) enrichment for differentially expressed transcripts associated  
259 with eggshell chorion assembly (FDR q-value < 1.44E-04, 15.4-fold enrichment). All of these transcripts  
260 were downregulated with age in both strains (Figure 3.9). The downregulation of eggshell transcripts was  
261 especially striking in Ral\_321, in which all but two eggshell transcripts showed a decrease with age (sign  
262 test: p-val < 1.60e-11; Fig 3.3). Ral\_237 also showed more eggshell transcripts downregulated with age  
263 than expected by chance (sign test p-value <.04) but the effect was not as strong as in Ral\_321 (Fig 3.9).

264

265 Somatic follicle cells work together to build the protective eggshell in oogenic stages 10-14. This process  
266 is dynamic, with transcript amounts changing rapidly between stages (Tootle et al., 2011; Yakoby et al.,  
267 2008). Due to the dynamism of expression in late stage oogenesis with regards to eggshell formation, we  
268 sought to verify that differential expression of chorion genes was not a consequence of different temporal  
269 snapshots in the collected samples. Tootle *et al.* (2011) performed a microarray analysis on 150 genes  
270 expressed in a stage-specific manner in the last 24 hours of follicle development, delineated by stages 9-  
271 10a, 10b, 12, and 14. This gene expression dataset included 30 previously known eggshell genes, 19 new  
272 candidate chorion genes, and other non-eggshell or chorion genes that showed 4-fold changes in  
273 expression at late stages of follicle development. Because this gene expression dataset provides an

274 independent temporal profile of gene expression in late stage oogenesis, we cross-checked our young and  
275 old egg chamber expression data against the 49 eggshell-specific transcripts. Critically, gene expression  
276 in our samples is strongly correlated with expression in stage-14 egg chambers reported in Tootle 2008  
277 (Pearson's product-moment correlation = 0.85, p-value < 7.80e-15) but not correlated in stages 9-10, 10b,  
278 or 12, confirming that we had captured stage 14 egg-chambers in our analysis (Fig. 3.8).

279

280 The decrease in chorion transcripts with age corroborates findings of numerous other studies (Carlson et  
281 al., 2015; Doroszuk, 2012; Pletcher, 2002) and here we demonstrated that this age-effect can also vary in  
282 effect between strains. The discrepancy between the strains could also be due to the fact that we used  
283 chronological age for sampling instead of physiological age. Doroszuk et al., 2012 finds that long-lived  
284 flies do not experience a typical decline of reproduction function in the later stages of life which may  
285 alternatively explain why we didn't detect as significant of chorion effects in the strain with slightly  
286 longer median lifespan (Doroszuk, 2012; Ivanov et al., 2015).

287

288 Differentially expressed genes in egg chambers enriched for residence in dispersed heterochromatin, but  
289 no global genome-wide relaxation of heterochromatic silencing

290

291 Previous studies have implicated aberrant gene expression changes with age to changes in the  
292 heterochromatin landscape in the soma (Bell et al., 2012; De Cecco, 2013a, b; Jiang, 2013; Larson et al.,  
293 2012; Shah et al., 2013; Wood et al., 2010). Genome-wide expression data can be utilized as a proxy for  
294 heterochromatic changes by assessing whether genes associated with regions of heterochromatin  
295 experience age-related changes in expression. Based on previous studies, we hypothesized that genes  
296 located near heterochromatin boundaries, specifically near telomeres and centromeres, may be enriched  
297 for differential expression in aging. Kharchenko et al., 2011 described a genome-wide chromatin

298 landscape in *Drosophila melanogaster* based on 9 prevalent combinatorial patterns of 18 histone  
299 modifications (Kharchenko et al., 2011). Pericentromeric heterochromatin domains were characterized by  
300 high levels of H3K9me2/me3. We intersected locations of our gene set with the heterochromatin regions  
301 described in that study. Of the significantly differentially expressed egg chamber transcripts across both  
302 strains in age, we found enrichment for genes in locations of intercalary heterochromatin (Figure 3.3A, 47  
303 differentially expressed genes from 1695 genes in heterochromatin, 300 genes differentially expressed  
304 from 14289 total genes; Chi-squared with Yate's correction, two-tailed p-value = 0.034). We also found a  
305 striking enrichment for differentially expressed genes on the fourth or "dot" chromosome, which is  
306 primarily heterochromatic and carries only 84 genes (8 genes differentially expressed from 84 total genes  
307 on the dot, 300 genes differentially expressed overall from 14289 total genes; Chi-squared with Yate's  
308 correction, two-tailed p-value < .0001). Other than the enrichment for genes on the dot chromosome,  
309 there was no obvious signature of enrichment for differentially expressed genes specifically in pericentric  
310 heterochromatin (Fig. 3.3A). Critically, we find that the nature of expression change with genes  
311 associated with heterochromatin is not in one direction. Differentially expressed genes associated with  
312 heterochromatin both increase and decrease during aging (Fig. 3.3A). This is unexpected under the  
313 standard heterochromatic aging hypothesis where heterochromatin function becomes lessened and  
314 heterochromatic genes become derepressed. Therefore, while heterochromatic regions of the genome tend  
315 to be enriched for genes that change in expression during aging, this indicates a general release of  
316 regulation, but not release from silencing *per se*.

317

318 To test whether there was also a subtle derepression of genes located in heterochromatin genome-wide,  
319 we compared age-related expression of all genes which overlapped with heterochromatin in the genome.  
320 We found no obvious change in distributions of gene expression ratios between young and old egg  
321 chambers of genes located in described regions of heterochromatin compared to the rest of the genome  
322 (Figure 3.3B)

323

324 We also tested whether the strain specific age-related changes for genes in intercalary heterochromatic  
325 regions were due to euchromatic TE insertions that differed between strains. It has been shown that some  
326 euchromatic TE insertions can nucleate heterochromatin formation through piRNA targeting (Sentmanat  
327 and Elgin, 2012; Shpiz et al., 2014). We used the DGRP strain-specific TE insertion data from TIDAL-fly  
328 (Rahman et al., 2015) to compare TE insertion locations across the two strains. However, we did not see  
329 strain-specific differences in TE insertions that correlated with aging effects that varied between the two  
330 strains.

331

332 Other studies have reported decreased expression in heterochromatin modifiers with age. We therefore  
333 determined whether genes associated with the gene ontology term for chromatin modifiers showed  
334 enrichment for a certain directionality change with age. In egg chambers of both strains, chromatin  
335 modifiers tended to increase in expression with age (Ral\_237 exact binomial test, p-value < 0.0004;  
336 Ral\_321 exact binomial test, p-value < .002). Chromatin modifiers in embryos, however, tended to  
337 decrease in expression with maternal age (exact binomial test, p-value < 0.03).

338

339 No global release of transposable element expression in aged egg-chambers

340

341 Previous studies have shown that transposable elements become derepressed in the soma during aging,  
342 notably in brains and fat body of *Drosophila*, and in a variety of other organisms including mammals  
343 (Chen et al., 2016; De Cecco, 2013a, b; Li et al., 2013; Maxwell et al., 2011; Patterson et al., 2015).  
344 However, a recent study on sequencing artifacts have called some of these results into question (Treiber  
345 and Waddell, 2017). Because TEs and small RNA mechanisms of genome defense are primarily  
346 expressed in the germline, we aimed to determine whether TE de-repression during aging occurs in

347 reproductive tissues in which they are primarily active. In contrast to other studies, we found no global  
348 TE derepression in egg chambers. While one transposable element, *copia*, increased with age across both  
349 strains, the other four TEs that showed differential expression with age across strains decreased in  
350 expression (Fig. 3.1A, Fig. 3.4, Table 2). Additionally, two TEs, *pogo* and *Juan*, showed a significant  
351 strain-by-age effect, exhibiting opposing directions of expression with age across the strains (Fig 3.4C  
352 and 3.4D). Figure 3.4D also illustrates that the TEs that are significant in Ral 321 are dispersed  
353 throughout the wider distribution of TE expression for Ral 237. There is also no correlation between the  
354 ratio of TE expression between young and old egg chambers across strains (Figure 3.4E).

355

#### 356 piRNA pathway transcripts upregulated in aging egg chambers

357

358 TE control by piRNA in the germline has been shown to be sensitive to aging. This has been attributed to  
359 an increased capacity for TE fragments residing in heterochromatin to contribute to the piRNA pool in  
360 older flies (Grentzinger et al., 2012). Moreover, this effect of aging can be transmitted across generations  
361 since maternally transmitted piRNA pools establish piRNA biogenesis in offspring. Since some TEs did  
362 show significant differential expression with age, we sought to check whether genes in the piRNA  
363 pathway, which regulate TE expression in the *Drosophila* germline, showed any age-related-expression  
364 changes in egg chambers. Strikingly, 27 out of 31 piRNA pathway genes show an average transcriptional  
365 increase with age across the two strains in egg chambers (exact binomial test, p-value < 3.4E-05; Fig.  
366 3.6). piRNA genes are also enriched in the top 10% of differentially expressed transcripts ranked  
367 significance (Chi squared with Yate's correction, p-value = .044). Notably, we did not see these age-  
368 effects carried over into the embryo (Fig 3.6C), indicating that this effect may primarily be happening in  
369 the follicle cells.

370

371 Differential expression in the aging egg chamber is driven by both somatic and germline changes

372

373 Stage-14 egg chambers consist of a mixture of somatic follicle cells and germline material. It is  
374 challenging to tease-apart intrinsic aging of the germline from extrinsic factors such as functional decay  
375 of the niche (Zhao et al., 2008). We found that *tsunagi* significantly decreased with age in egg chambers  
376 (1.75-fold decrease, FDR p-value < 0.0008) (Supp. Table 3.2). *Tsunagi* is required in the germline for  
377 proper oogenesis and plays a critical role in in oocyte fate (Mohr et al., 2001; Parma et al., 2007).  
378 However, it's possible that transcript change observed in stage 14 egg-chambers could be coming from  
379 the somatic follicular sheath and therefore not necessarily indicative of possible age effects in the oocyte.

380

381 We sought to determine whether differential expression during aging was mostly driven by somatic or  
382 germline transcripts by performing RNAseq of 0-1 hour embryos of young and old mothers. Maternal  
383 germline transcripts can be sequenced because *Drosophila* embryos do not undergo zygotic transcription  
384 for approximately two hours. The age-related changes we had seen for *tsunagi* in egg chambers showed  
385 the same directionality changes between embryos of young and old mothers (Supp. Table 3.2) supporting  
386 the idea that this was an age-related effect occurring in the germline. We next checked whether the  
387 Differentially expressed transcripts in egg chambers showed similar directional changes in embryos of  
388 *Ral\_321* as egg chambers across age. It is important to note that many transcripts are not maternally  
389 deposited and therefore not expressed in 0-1 hour embryos. The genic transcripts that were differentially  
390 expressed in egg chambers and also expressed in 0-1 hr embryos (threshold expression set at above 1.0  
391 RPKM average) did show a significant positive correlation (Pearson's Product-Moment Correlation, R=  
392 0.31, p-value < 2.85e-06), indicating that some age-related gene expression changes were occurring in the  
393 germline rather than simply the follicle cells of stage-14 egg chambers (Fig. 3.7). However, the  
394 mitochondrial transcripts with detectable expression in embryos did not show any correlation with  
395 changes observed in egg chambers and showed opposite directionality of expression. Thus, we can



396 attribute the observed decrease in mitochondrial transcripts in stage-14 egg chambers to effects in the  
397 somatic follicle cells. This also indicates opposing age-related effects occurring in the somatic follicle  
398 sheath versus the germline.

399

400 We also identified fewer genes with differentially expressed in 0-1 embryos of young versus old mothers  
401 when compared to the egg chamber data, though this may be attributed to lower power from fewer  
402 replicates. The dynamic nature during early embryogenesis may have also contributed to high variability  
403 in gene expression in this stage (Supp. Table 3.2). In 0-1 hour embryos, zygotic transcription is low, but  
404 de-adenylation of maternal transcripts may contribute dynamically to rapid changes in apparent gene  
405 expression across 0-1 hours.

406

407 Our results indicate that age-effects occur in both the somatic cells surround the developing egg as well as  
408 in the germline. Additionally, some of transcriptional changes we identify, such as *tsunagi*, may be  
409 contributing factors to compromised germ cell division and differentiation that occurs with age.

410

411 Subtle de-repression of TEs in pre-zygotically active embryos of aged mothers

412

413 Because TEs are primarily active in the germline and maternal transcripts are deposited into the embryo,  
414 we may expect to see a correlation between TE age effects in the egg chambers and embryos. We find no  
415 such correlation in expression between late stage egg chambers and 0-1 hour embryos of the same strain  
416 (Fig. 3.5B and 3.5C). The TEs that were differentially expressed in egg chambers are for the most part in  
417 the middle of the distribution for TE expression in embryos (Figure 3.5B). We do however find a subtle,  
418 yet significant enrichment for TEs increasing in expression in embryos of old mothers (Figure 3.5A,  
419 Exact binomial test,  $p < 1.462e-08$ ; Figure 3.5B). The differentially expressed TEs that we observed in

420 egg chambers may be primarily driven by the somatic follicle cells, masking the subtle increase of  
421 expression in TEs of the oocyte. Alternatively, there may be an independent de-repression of TEs that  
422 occurs in embryos.

423

424

425

## 426 DISCUSSION

427

428 With delays in childbearing on the rise, the study of reproductive decline grows increasingly relevant  
429 (Billari et al., 2007). Fruit flies are an excellent model organism to study because they experience a clear  
430 reproductive decline, existing age-related literature in flies is vast, and *Drosophila* share several  
431 mechanisms and pathways in ovulation and gametogenesis with mammals (Sun and Spradling, 2013).

432

433 Genome-wide RNAseq studies have shown that different tissues vary in age-related signatures,  
434 highlighting the importance of analyzing each tissue individually in each species (Sharov et al., 2008;  
435 Zhan et al., 2007). Reproductive tissues are unique in that they are a mix of interacting somatic and  
436 germline tissue. While the germline is widely recognized as being more resistant to aging than somatic  
437 cells, some age-related changes are known to occur. Critically, the relative contribution of factors intrinsic  
438 versus extrinsic to the germ line in reproductive decline remains poorly understood.

439

440 Here, we report a set of genes that show concerted changes across genetic backgrounds in aged egg-  
441 chambers. We additionally highlight the role genetic background plays in age-related effects. For  
442 example, while the decline we show in chorion-related transcripts with age parallels other studies, we  
443 propose that the severity of this age-effect depends on genetic background.

444

445 We also show that aging in late stage egg chambers mirrors that of other tissues, with a downregulation of  
446 transcripts from the mitochondria and nuclear transcripts associated with mitochondrial activity. Oocytes  
447 have significantly more mitochondria than any other cell, highlighting the incredible energy demands at  
448 stake in gametogenesis (May-Panloup et al., 2007). The dysfunction of oocyte mitochondria has been  
449 proposed as a possible mechanism involved in reduced competence of oocytes in older human infertility  
450 patients (Zhang et al., 2017). One of the most well documented age-effects thought to reduce female  
451 fertility is chromosome abnormality in oocytes. There is evidence that reduced mitochondrial activity may  
452 contribute to this decline, as improper chromosome segregation has been induced in oocytes deficient in  
453 mitochondrial enzymes that metabolize pyruvate (Johnson et al., 2007). Our results support the idea that  
454 mitochondrial age effects could contribute to reproductive decline. Because mitochondria are maternally  
455 transmitted, the possible deposition of abnormal mitochondria with advanced age has been hypothesized  
456 to negatively contribute to offspring health. Here we find no evidence that mitochondrial transcript  
457 decline is propagated, as embryos of young and old mothers do not display the same expression patterns  
458 as seen in egg chambers. In contrast, maternally deposited mitochondrial transcripts in embryos increase  
459 with age. Thus, we propose that the effects of aging in the *Drosophila* ovary on mitochondrial gene  
460 expression are largely born out in somatic follicle cells.

461

462

463 Epigenetic changes have been implicated as playing an important role in the aging process in cells of the  
464 soma across model organisms. Specifically, genome-wide heterochromatin redistribution during aging has  
465 been linked to the de-repression of transposable elements and an overall loss of gene regulation. Whether  
466 or not epigenetic factors are perturbed in reproductive and germline tissues is of particular interest  
467 because some epigenetic factors are known to transmit across generations (Greer et al., 2016; Grentzinger  
468 et al., 2012; Zenk et al., 2017). Current theories of evolutionary aging depend on the assumption that age-  
469 related effects do not manifest in offspring. If age-related effects are in fact transgenerational, this could  
470 complicate current evolutionary explanations for aging.

471  
472  
473  
474  
475  
476  
477  
478  
479  
480  
481  
482  
483  
484  
485  
486  
487  
488  
489  
490  
491  
492  
493  
494  
495

While several studies have reported aberrant gene expression in aging on a genome-wide scale (De Cecco, 2013a; Jiang, 2013; Shah et al., 2013), we report no overall loss of gene regulation in aged egg chambers, consistent with another *Drosophila* study using whole bodies (Pletcher, 2002). Previously, it was shown that reporter genes residing in heterochromatin regions of the fly experienced loss of silencing with age (Jiang, 2013). In line with these findings, we too show that genes that show significant age-related expression differences are enriched for regions of heterochromatin, providing evidence for age-related epigenetic changes occurring in late stage egg chambers of *Drosophila* oogenesis. However, we do not however find evidence that the landscape of heterochromatic silencing is relaxed in older egg chambers. Some studies have also reported a decrease in expression of transcripts involved with heterochromatin modification. Here we find that these transcripts do significantly change with age, although in opposite directionality between egg chambers and embryos. This opposing effect in the soma versus germline indicates that patterns of aging may not be universal across tissue types.

Of significant interest is the conserved age-related changes we found between egg chambers and embryos of aged females. These indicate changes in the aged germline *per se*, not simply in the gonad that is a mixture of somatic and germline tissues. These also indicate that aging effects on gene expression in older mothers can be deposited into embryos and transmitted across generations. Since many of the maternal RNA transcripts deposited in embryos are required for embryonic development, this raises the need for further studies of how the maternal transcript pool may change with age and how faithfully those transcripts are deposited into embryos.

496 A decline in repressive heterochromatin with age has been associated with TEs becoming active and  
497 mobile in aging somatic cells (Li et al., 2013; Patterson et al., 2015). Because increased transposition  
498 promotes DNA damage and increased mutagenesis, age-related transposable element de-repression has  
499 also been proposed to be an important component of genomic instability and a contributor to the  
500 prevalence of disease that accompanies advanced age. Here, we find no evidence that TEs are derepressed  
501 as a general feature of aging in egg chambers. In contrast, we find that the handful of TEs that are  
502 differentially expressed with age tend to decrease in expression with age, in conflict with current TE  
503 aging theories, but in line with the idea of adaptive piRNA-mediated immunity with age (Khurana et al.,  
504 2011a). The increase in expression in piRNA pathway genes reported here also lends support to this  
505 hypothesis and suggests that, in contrast to non-reproductive tissues, mechanisms that limit the harm of  
506 TEs may be increased in aging reproductive tissues. It would be worth comparing relative piRNA levels  
507 complementary to these TEs in a future study. We also demonstrate that TE age-effects in egg chambers  
508 depend on both the genetic background and TE. It is also worth noting that a recent study demonstrates  
509 the role artifacts play in leading to incorrect transposition estimation in the soma, possibly throwing  
510 previous age-related results into question (Treiber and Waddell, 2017). One interesting finding in our  
511 study that deserves further investigation is the subtle increase in TE expression we found when comparing  
512 embryos of young and old mothers. In a future study, it would be worth repeating this experiment, paired  
513 with a comparison of piRNA profiles of embryos of young and old mothers.

514

515

516 In summary, here we show that there is evidence for age-related change within the reproductive tissues  
517 and germline of *Drosophila melanogaster*. However, these tissues are more robust to age-related change  
518 in gene expression than the soma, as we find no global TE derepression or global relaxation of  
519 heterochromatic silencing with age. We also report that some significant age-related changes in the egg  
520 chambers of ovaries persist in embryos. This study supports the conclusion that while there exists a

521 potential to pass on age-related maternal effects, the germline is generally robust to age-related epigenetic  
522 changes.

523

524

525

## 526 FIGURES

527 **Figure 3. 1. Signature of age-related expression in egg chambers across genetic background.** (A) Average log  
528  $2(\text{RPKM}+.5)$  expression of stage 14 egg chamber transcripts of old 30 - 34 day old samples versus young 3-4 day  
529 old samples. Transcripts significantly expressed between young and old in a paired analysis ( $\text{FDR}<.05$ ) are colored  
530 according to transcript type. Five TE transcripts are significantly differentially expressed across both strains with  
531 age, with only one, copia, showing an increase in expression. (B) Log<sub>2</sub> ratios of old to young ( $\text{RPKM}+.5$ )

532 expression between strains. The differentially expressed transcripts (FDR  $p < .05$ ) are strongly and significantly  
533 correlated with age across strains.

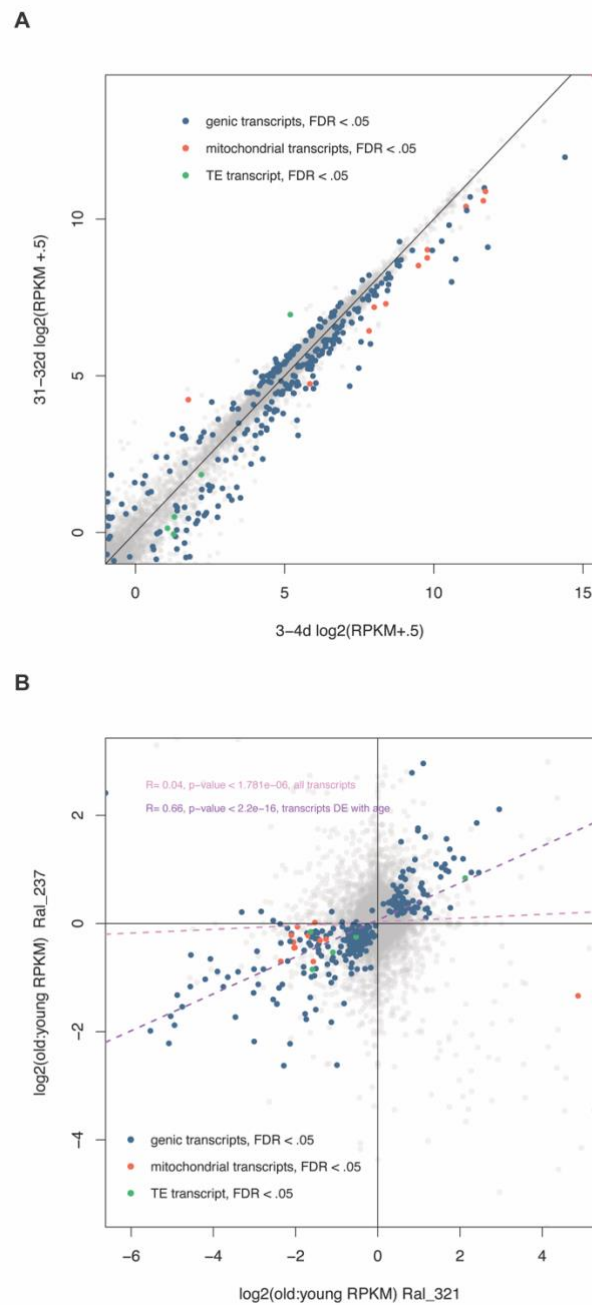

534

535

536 **Figure 3. 2. Majorities of mitochondrial genome and nuclear mitochondrial transcripts decrease expression in**  
537 **egg chambers with age.** (A) There is an average reduction in mitochondrial genome transcript expression in stage  
538 14 egg chambers across strains. Some transcripts are also significant for an age by strain interaction with greater  
539 age-related fold-changes (RPKM) in Ral\_321. Gray color signifies no expression or no concerted change across

24

540 strains. (B) Log2 ratios of old to young (RPKM+.5) expression between strains of mitochondrial transcripts from the  
 541 nuclear genome.

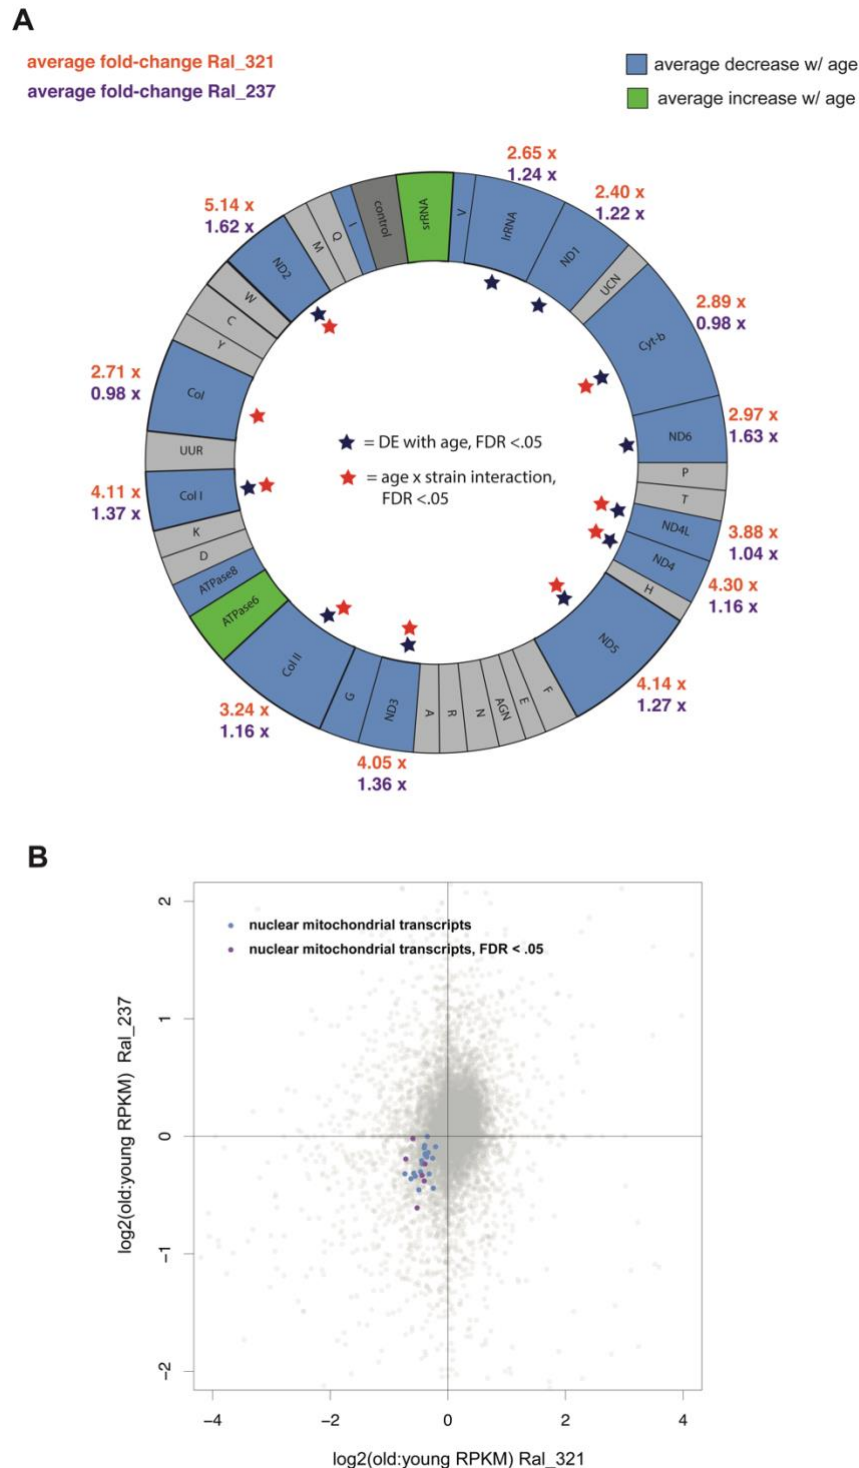

542

543 **Figure 3. 3. DE transcripts enriched for intercalary heterochromatin and the 4th chromosome.** (A) Positional  
 544 information of differentially expressed genic transcripts across both strains. The notation “het” indicates that the  
 545 genic location intersects with heterochromatin-associated proteins, H3K9me2/me3, as reported in Kharchenko et al



25

546 2011. DE (differentially expressed) genes located in regions of intercalary heterochromatin do not show a concerted  
547 directionality change of expression with age (Chi-squared with Yate's correction, two-tailed p-value <.034). The 4th  
548 chromosome is highly enriched for DE genes considering its limited gene composition Chi-squared with Yate's  
549 correction, two-tailed p-value < .0001. (B) Log<sub>2</sub>(young/old RPKM) of all genes located in heterochromatin versus  
550 Log<sub>2</sub>(young/old RPKM) genome-wide expression change with age. Genes in heterochromatin show similar age-  
551 related pattern of expression change as the rest of the genome.

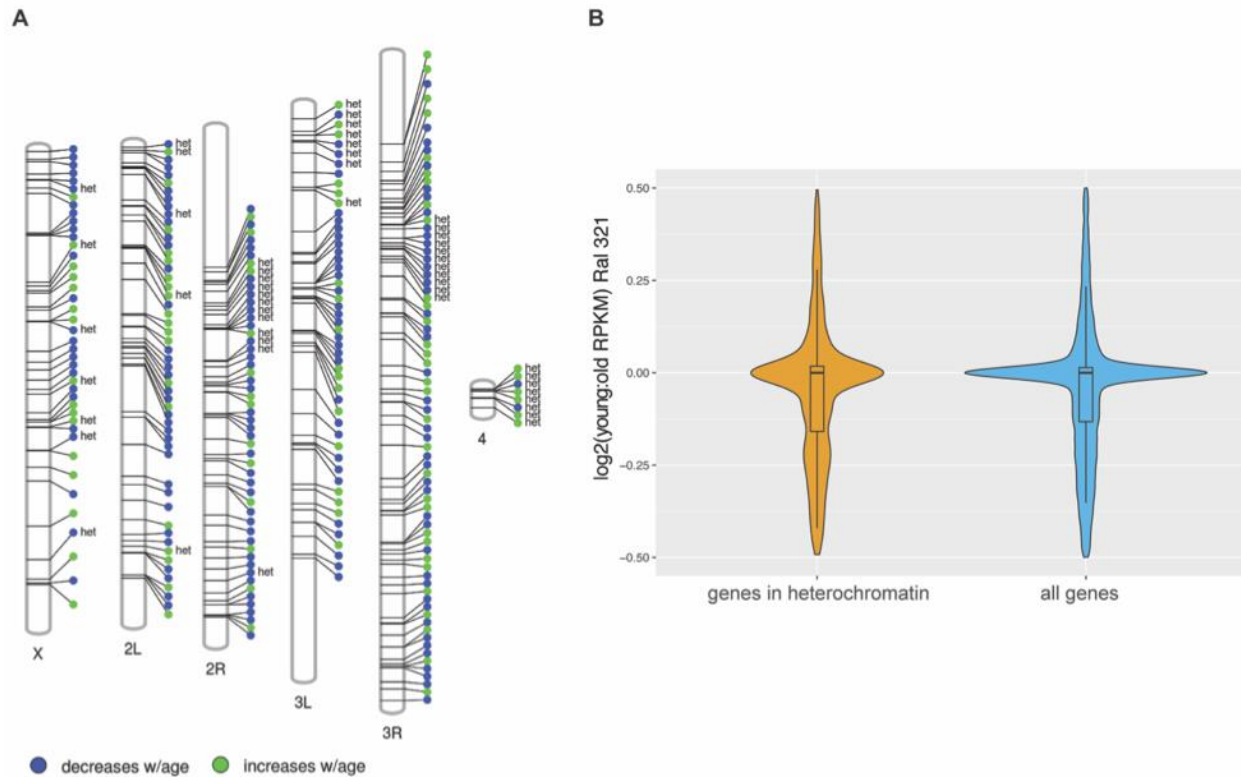

552

553

554

555

556

557

558

559

560

561

562

563 **Figure 3.4. No global derepression of TEs in egg chambers from aged females.** A and B ) Heatmap of  
564 transposable element log<sub>2</sub> (RPKM+1) expression in egg chambers normalized by Row Z-Score. "O"= 30-34day old

26

565 egg chambers, “Y” = 3-4 day old egg chambers. No clear patterns of TE expression occur with age. (C) TEs ordered  
 566 by ratios of expression from old to young egg chambers in Ral\_321. TEs significantly differentially expressed with age  
 567 age in Ral\_321 tend to decrease with age. (D) TEs ordered by ratio of expression in Ral\_237. Ral\_237 shows  
 568 differentially expressed TEs intercalated through a broader distribution of TE expression. (E) Log2 ratios of old to  
 569 young RPKM+.5 of TE expression do not show a correlation with age across strains. Two TEs, pogo and Juan show  
 570 significant age by strain interactions.

**A**

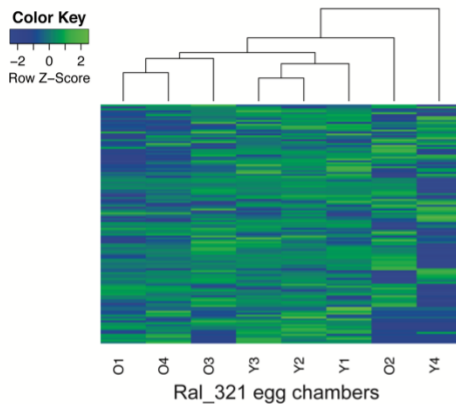

**B**

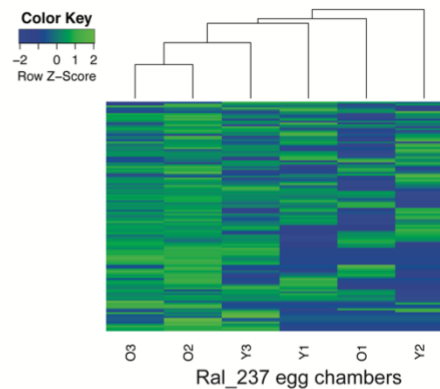

**C**

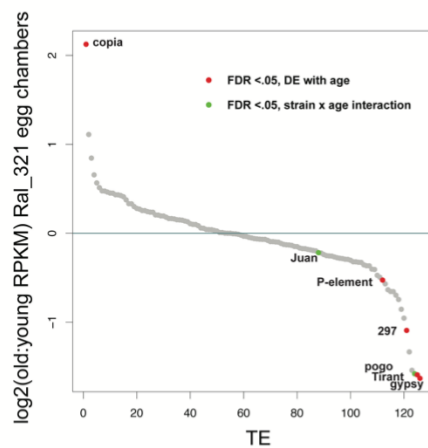

**D**

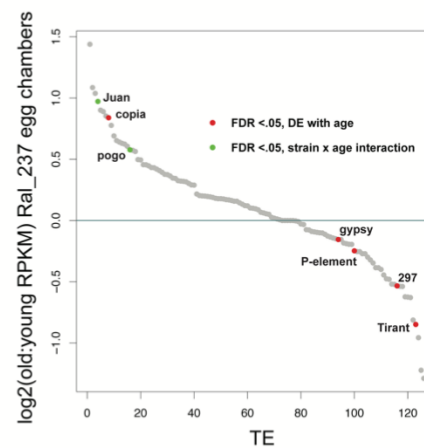

**E**

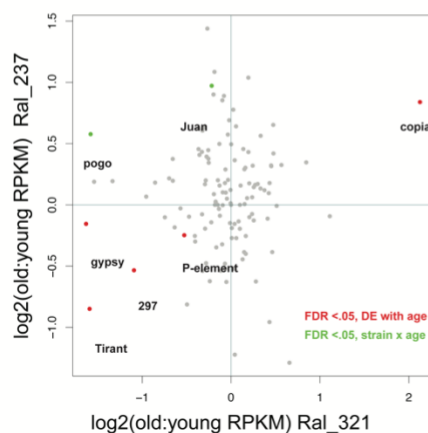

571

27

572 **Figure 3. 5. TE age effects differ from egg chamber to embryo.** (A) Heatmap of transposable element log<sub>2</sub>  
573 (RPKM+1) expression in Ral\_321 embryos normalized by Row Z-Score. “O”= embryos of 30-34day old mothers,  
574 “Y”= embryos of 3-4 day old mothers. Old samples show subtle increase of expression with age. (B) TEs ordered  
575 by ratios of expression from embryos of old versus young mothers in Ral\_321. Transcripts that were differentially  
576 expressed in egg chambers of the same strain are interspersed within the broader distribution of TE expression. The  
577 majority of TE transcripts show increased expression with age. (C) Log<sub>2</sub> ratios of old to young RPKM+.5  
578 expression between egg chambers and embryos. TE transcripts change in egg chambers are not predictive of TE  
579 transcript changes in embryos.

A

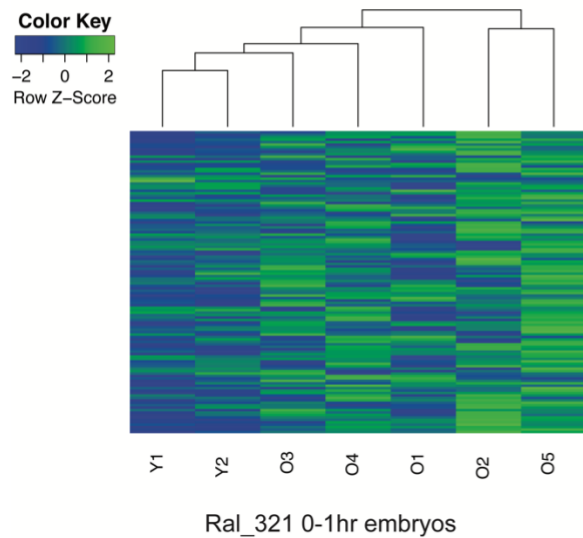

B

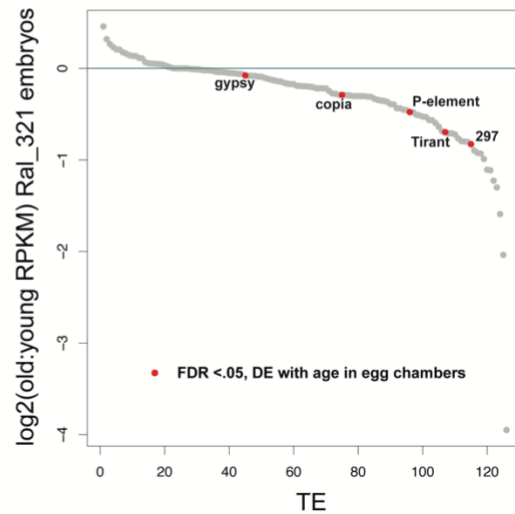

C

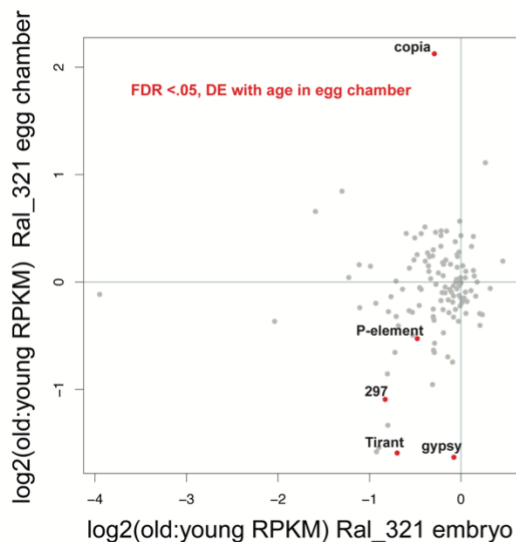

580

581

582

28

583 **Figure 3. 6. piRNA transcripts increase with age in egg chambers.** A) Expression (RPKM+.5) of piRNA  
 584 pathway transcripts between egg chambers of young and old females. Red dots indicate transcripts that were in the  
 585 top 10% of significant FDR-adjusted p-values. B) Log2 ratios of old to young piRNA pathway transcript expression  
 586 (RPKM+.5) in egg chambers across strains. Both strains show a that a majority of piRNA transcripts increase with  
 587 age. C) Log2 ratios of old to young piRNA pathway expression between egg chambers and embryos. Embryos of  
 588 old mothers do not show increased transcript expression of piRNA genes.

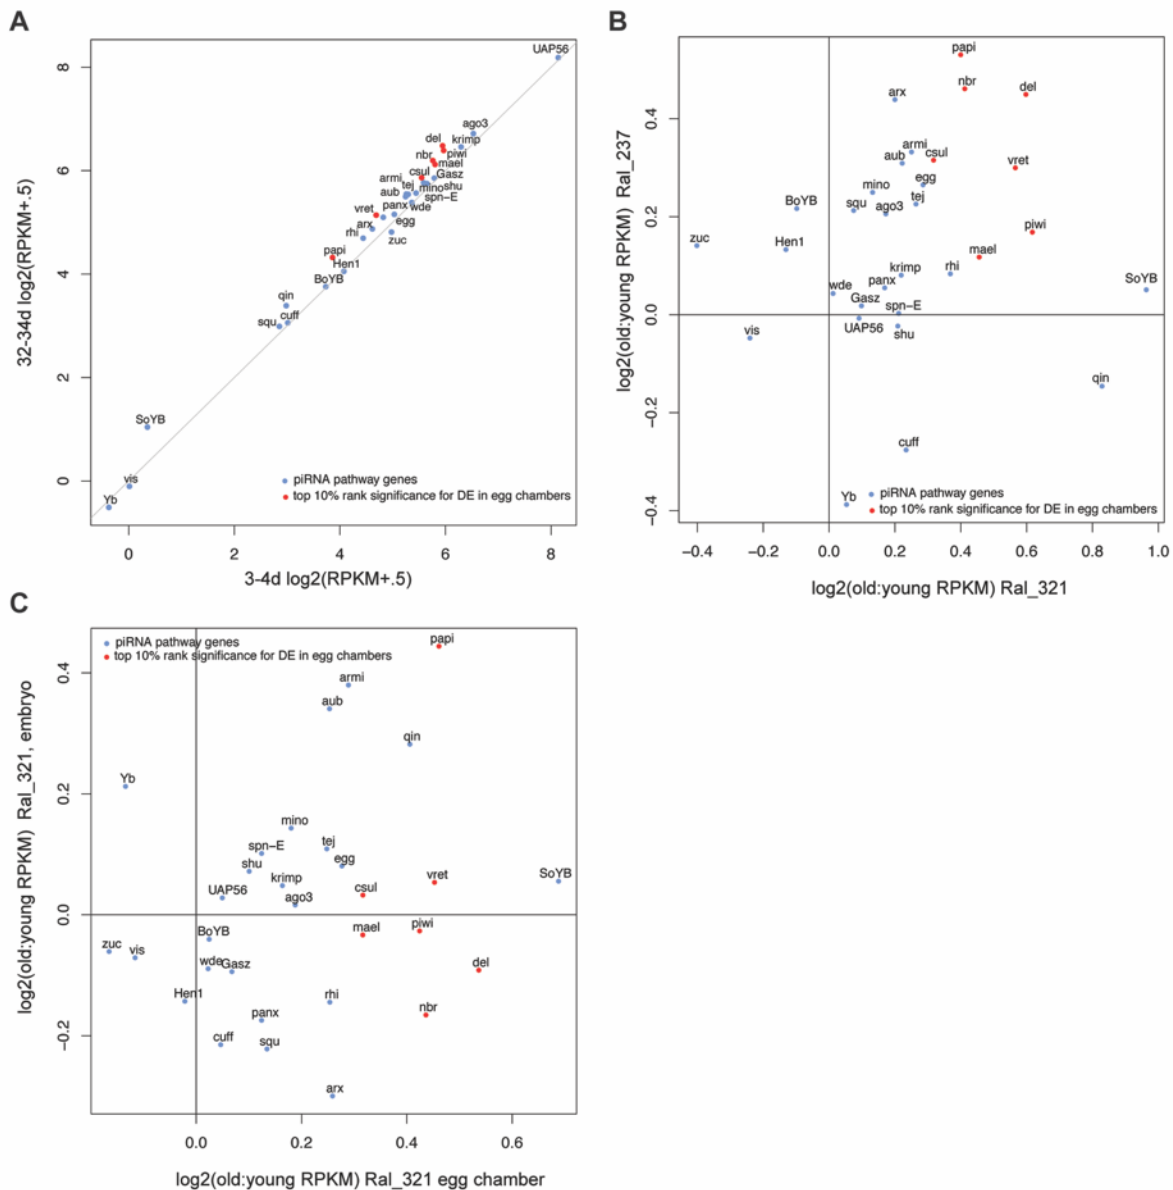

589

590

591

592 **Figure 3. 7. Some age-effects maternally deposited through germline.** Log2 ratios of old to young (RPKM+.5)  
593 expression between egg chambers and embryos of the same strain. Transcripts that have expression above an RPKM  
594 expression threshold of 0.5 in embryos are mildly correlated in age-related change. Transcripts from the  
595 mitochondrial genome do not show correlated age-related change between egg chambers and embryos.

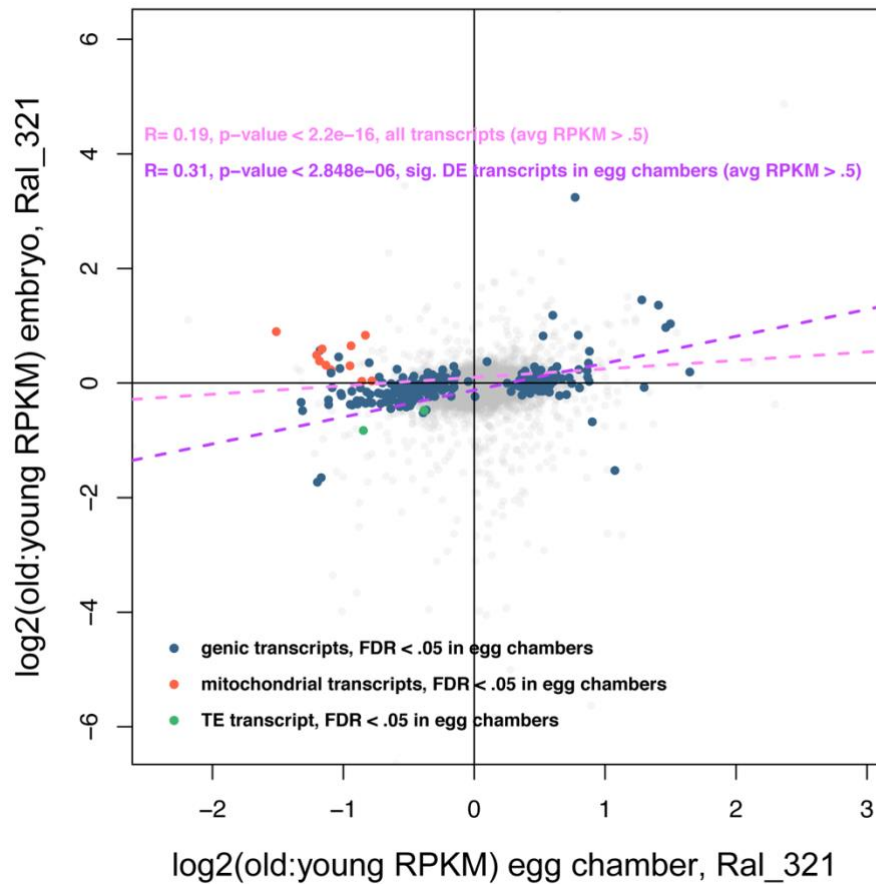

596

597

598

599

600 **Figure 3. 8. Verification of stage 14 transcript expression.** Transcripts that show stage-specific expression in final  
601 stages of oogenesis as defined by Tootle et al 2011. Transcript expression from stage 14 egg chambers is strongly  
602 correlated with stage 14 oogenic-specific transcript expression but not with the other stages in Tootle et al., 2011.

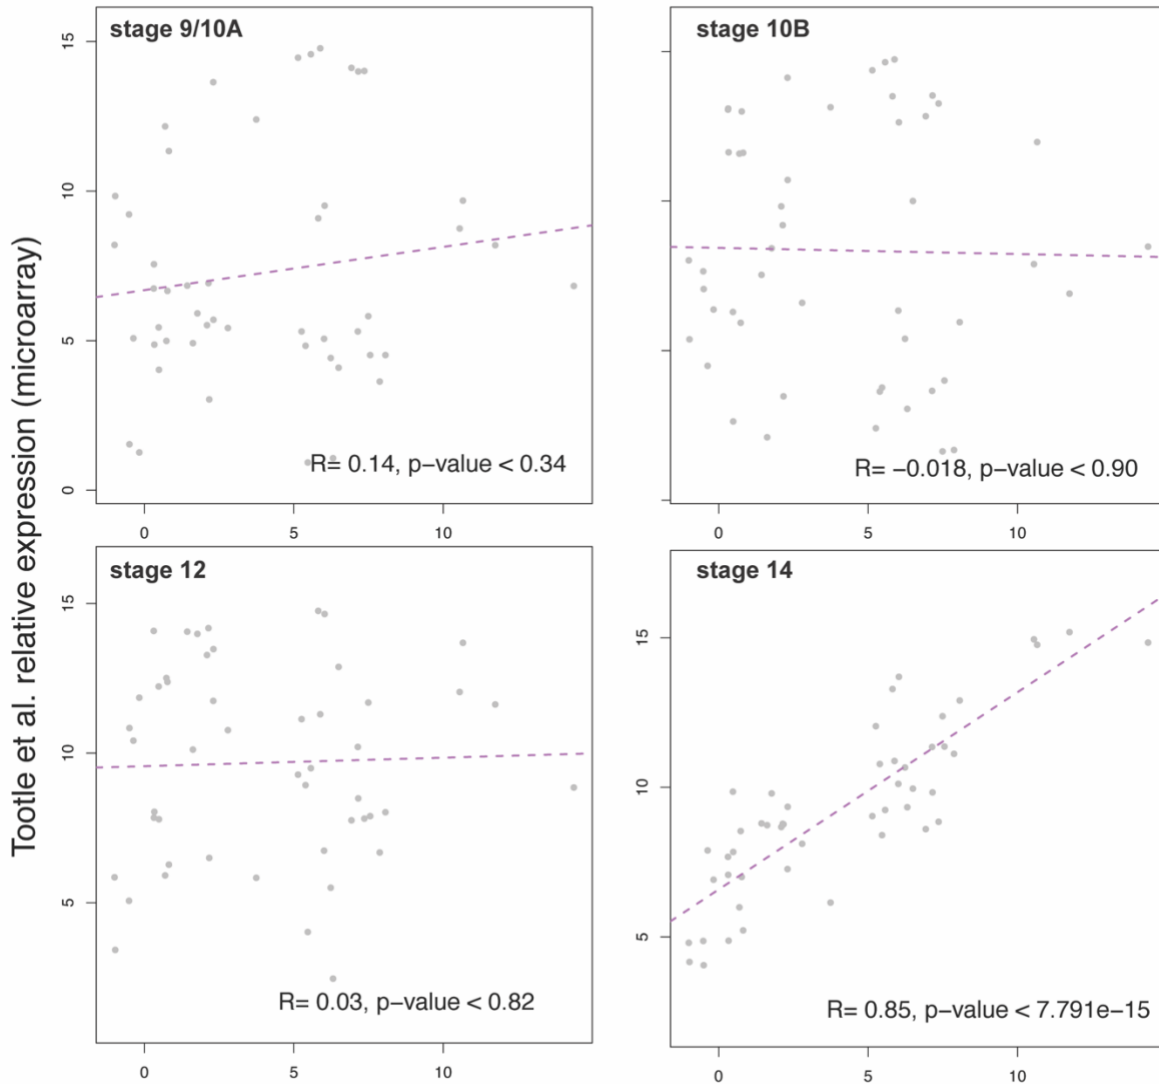

603

604

605

606

607

608 **Figure 3. 9. Transcripts associated with the eggshell are downregulated with age in both strains but show**  
609 **stronger age effects in Ral\_321.** Log<sub>2</sub> ratios of expression (RRKM + .5) of transcripts associated with the eggshell  
610 between young and old egg chambers across strains.

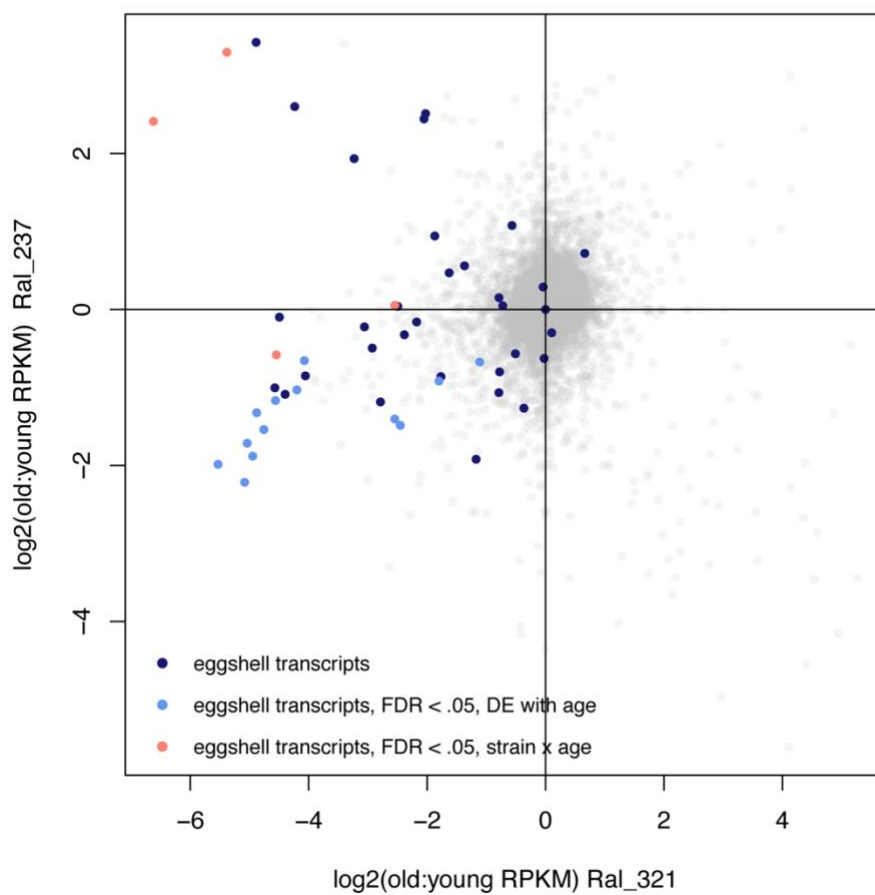

611

612

613

614

615

616

617

618 TABLES

619 **Table 3. 1. Sample overview of stage 14 egg chambers.** Ral 237 and Ral 321 were the two DGRP strains utilized  
620 for RNA sequencing analysis. D=days post-eclosion. Each biological replicate is a pool of egg chambers from five  
621 females.

622

| <b>DGRP STRAINS</b> | <b># BIOLOGICAL<br/>REPLICATES (3-4D)</b> | <b># BIOLOGICAL<br/>REPLICATES (32-34D)</b> |
|---------------------|-------------------------------------------|---------------------------------------------|
| RAL_321             | 4                                         | 4                                           |
| RAL_237             | 3                                         | 3                                           |

623

624

625

626

627

628

629

630

631

632

633

634

635

636

637



638 **Table 3. 2. Differential expression results for TEs.** TEs that show significant differential expression with age in  
 639 egg chambers. Two TEs show a strain by age interaction. Fold change refers to fold change differences in RPKM  
 640 levels. TEs significantly differentially expressed in egg chambers decrease with age in embryos but are not  
 641 statistically significant.

| <i>TE</i>        | <i>EGG CHAMBER</i> |                |                    |                  |                     | <i>EMBRYO</i>  |                  |
|------------------|--------------------|----------------|--------------------|------------------|---------------------|----------------|------------------|
|                  | fold change        |                |                    | FDR adj. p-value |                     | fold decrease  | FDR adj. p-value |
|                  | <i>Ral_321</i>     | <i>Ral_237</i> | <i>drxn w/ age</i> | <i>age</i>       | <i>strain x age</i> | <i>Ral_321</i> | <i>age</i>       |
| <i>Tirant</i>    | 3.02               | 1.80           | down               | <b>0.007</b>     | 0.940               | 1.62           | 1.0              |
| <i>297</i>       | 2.13               | 1.45           | down               | <b>0.010</b>     | 0.869               | 1.78           | 1.0              |
| <i>Gypsy</i>     | 3.10               | 1.11           | down               | <b>0.011</b>     | 0.125               | 1.06           | 1.0              |
| <i>Copia</i>     | 4.36               | 1.79           | up                 | <b>0.034</b>     | 0.849               | 1.22           | 1.0              |
| <i>P-element</i> | 1.44               | 1.19           | down               | <b>0.041</b>     | 0.939               | 1.39           | 1.0              |
| <i>Pogo</i>      | 2.99               | 1.49           | down, up           | 0.125            | <b>0.027</b>        | 1.90           | 1.0              |
| <i>Juan</i>      | 1.16               | 1.96           | down, up           | 0.597            | <b>0.039</b>        | 1.37           | 1.0              |

642

643

644

645

646

647

648

649

650

651

652

653

654

655

656

657

658

659

660 REFERENCES

661

662 Alleman, M., Sidorenko, L., McGinnis, K., Seshadri, V., Dorweiler, J.E., White, J., Sikkink, K., and  
663 Chandler, V.L. (2006). An RNA-dependent RNA polymerase is required for paramutation in  
664 maize. *Nature* 442, 295-298.

665 Andreu, A.L., Arbos, M. A., Perez-Martos, A., Lopez-Perez, M. J., Asin, J., Lopez, N., Montoya, J. and  
666 Schwartz, S. (1998). Reduced mitochondrial DNA transcription in senescent rat heart.  
667 *Biochemical and Biophysical Research Communications* 252, 577-581.

668 Anxolabehere, D., Kidwell, M.G., and Periquet, G. (1988). Molecular characteristics of diverse  
669 populations are consistent with the hypothesis of a recent invasion of *Drosophila melanogaster* by  
670 mobile P elements. *Mol Biol Evol* 5, 252-269.

671 Aravin, A.A., Hannon, G.J., and Brennecke, J. (2007). The Piwi-piRNA pathway provides an adaptive  
672 defense in the transposon arms race. *Science* 318, 761-764.

673 Aravin, A.A., Lagos-Quintana, M., Yalcin, A., Zavolan, M., Marks, D., Snyder, B., Gaasterland, T.,  
674 Meyer, J., and Tuschl, T. (2003). The small RNA profile during *Drosophila melanogaster*  
675 development. *Developmental Cell* 5, 337-350.

676 Arbeitman, M.N., New, F.N., Fear, J.M., Howard, T.S., Dalton, J.E., and Graze, R.M. (2016). Sex  
677 Differences in *Drosophila* Somatic Gene Expression: Variation and Regulation by doublesex. *G3*  
678 (Bethesda) 6, 1799-1808.

679 Arteaga-Vazquez, M., Sidorenko, L., Rabanal, F.A., Shrivistava, R., Nobuta, K., Green, P.J., Meyers,  
680 B.C., and Chandler, V.L. (2010). RNA-mediated trans-communication can establish paramutation  
681 at the b1 locus in maize. *Proc Natl Acad Sci U S A* 107, 12986-12991.

682 Bauer, M., Katzenberger, J.D., Hamm, A.C., Bonaus, M., Zinke, I., Jaekel, J., and Pankratz, M.J. (2006).  
683 Purine and folate metabolism as a potential target of sex-specific nutrient allocation in *Drosophila*  
684 and its implication for lifespan-reproduction tradeoff. *Physiol Genomics* 25, 393-404.

- 685 Bell, J.T., Tsai, P.C., Yang, T.P., Pidsley, R., Nisbet, J., Glass, D., Mangino, M., Zhai, G., Zhang, F.,  
686 Valdes, A., et al. (2012). Epigenome-wide scans identify differentially methylated regions for age  
687 and age-related phenotypes in a healthy ageing population. *PLoS Genet* 8, e1002629.
- 688 Bergman, C.M., Quesneville, H., Anxolabehere, D., and Ashburner, M. (2006). Recurrent insertion and  
689 duplication generate networks of transposable element sequences in the *Drosophila melanogaster*  
690 genome. *Genome Biol* 7, R112.
- 691 Billari, F., Kohler, H.-P., Andersson, G., and Lundstrom, H. (2007). Approaching the Limit: Long-Term  
692 Trends in Late and Very Late Fertility. *Population and Development Review*, 149-170.
- 693 Bingham, P.M., Kidwell, M.G., and Rubin, G.M. (1982). The molecular basis of P-M dysgenesis - The  
694 role of the P-element, a P-Strain-Specific Transposon Family. *Cell* 29, 995-1004.
- 695 Blumenstiel, J.P. (2014). Whole genome sequencing in *Drosophila virilis* identifies Polyphemus, a  
696 recently activated Tc1-like transposon with a possible role in hybrid dysgenesis. *Mob DNA* 5, 6.
- 697 Blumenstiel, J.P., and Hartl, D.L. (2005). Evidence for maternally transmitted small interfering RNA in  
698 the repression of transposition in *Drosophila virilis*. *Proceedings of the National Academy of*  
699 *Sciences of the United States of America* 102, 15965-15970.
- 700 Blumenstiel, J.P., Noll, A.C., Griffiths, J.A., Perera, A.G., Walton, K.N., Gilliland, W.D., Hawley, R.S.,  
701 and Staehling-Hampton, K. (2009). Identification of EMS-Induced Mutations in *Drosophila*  
702 *melanogaster* by Whole-Genome Sequencing. *Genetics* 182, 25-32.
- 703 Bosco, G., Campbell, P., Leiva-Neto, J.T., and Markow, T.A. (2007). Analysis of *Drosophila* species  
704 genome size and satellite DNA content reveals significant differences among strains as well as  
705 between species. *Genetics* 177, 1277-1290.
- 706 Boyle, M., Wong, C., Rocha, M., and Jones, D.L. (2007). Decline in self-renewal factors contributes to  
707 aging of the stem cell niche in the *Drosophila* testis. *Cell Stem Cell* 1, 470-478.
- 708 Brennecke, J., Aravin, A.A., Stark, A., Dus, M., Kellis, M., Sachidanandam, R., and Hannon, G.J. (2007).  
709 Discrete small RNA-generating loci as master regulators of transposon activity in *Drosophila*.  
710 *Cell* 128, 1089-1103.

- 711 Brennecke, J., Malone, C.D., Aravin, A.A., Sachidanandam, R., Stark, A., and Hannon, G.J. (2008). An  
712 Epigenetic Role for Maternally Inherited piRNAs in Transposon Silencing. *Science* 322, 1387-  
713 1392.
- 714 Bucheton, A., Paro, R., Sang, H.M., Pelisson, A., and Finnegan, D.J. (1984). The molecular basis of the I-  
715 R hybrid dysgenesis syndrome in *Drosophila melanogaster* - Identification, cloning and properties  
716 of the I-Factor. *Cell* 38, 153-163.
- 717 Calleja, M., Pilar Pena, Cristina Ugalde, Carmen Ferreira, Roberto Marco, and Rafael Garesse (1993).  
718 Mitochondrial DNA Remains Intact during *Drosophila* Aging, but the Levels of Mitochondrial  
719 Transcripts Are Significantly Reduced. *The Journal of Biological Chemistry* 268, 18891-18897.
- 720 Carlson, K.A., Gardner, K., Pashaj, A., Carlson, D.J., Yu, F., Eudy, J.D., Zhang, C., and Harshman, L.G.  
721 (2015). Genome-Wide Gene Expression in relation to Age in Large Laboratory Cohorts of  
722 *Drosophila melanogaster*. *Genet Res Int* 2015, 835624.
- 723 Casacuberta, E., and Pardue, M.L. (2003). Transposon telomeres are widely distributed in the *Drosophila*  
724 genus: TART elements in the virilis group. *Proc Natl Acad Sci U S A* 100, 3363-3368.
- 725 Chambeyron, S., Popkova, A., Payen-Groschene, G., Brun, C., Laouini, D., Pelisson, A., and Bucheton,  
726 A. (2008). piRNA-mediated nuclear accumulation of retrotransposon transcripts in the *Drosophila*  
727 female germline. *Proceedings of the National Academy of Sciences of the United States of*  
728 *America* 105, 14964-14969.
- 729 Chandler, V.L. (2007). Paramutation: from maize to mice. *Cell* 128, 641-645.
- 730 Charlesworth, B., and Charlesworth, D. (1983). The population dynamics of transposable elements.  
731 *Genetical Research* 42, 1-27.
- 732 Charlesworth, B., and Langley, C.H. (1989). The population genetics of *Drosophila* transposable  
733 elements. *Annual Review of Genetics* 23, 251-287.
- 734 Chen, H., Zheng, X., Xiao, D., and Zheng, X. (2016). Age-associated de-repression of retrotransposons in  
735 the *Drosophila* fat body, its potential cause and consequence. *Aging Cell* 15, 542-552.

- 736 Clark, A.G., Eisen, M.B., Smith, D.R., Bergman, C.M., Oliver, B., Markow, T.A., Kaufman, T.C., Kellis,  
737 M., Gelbart, W., Iyer, V.N., et al. (2007). Evolution of genes and genomes on the *Drosophila*  
738 phylogeny. *Nature* 450, 203-218.
- 739 Coyne, J.A. (1986). Meiotic segregation and male recombination in interspecific hybrids of *Drosophila*  
740 *Genetics* 114, 485-494.
- 741 Coyne, J.A. (1989). Mutation rates in hybrids between sibling species of *Drosophila*. *Heredity* (Edinb) 63  
742 ( Pt 2), 155-162.
- 743 Czech, B., Preall, J.B., McGinn, J., and Hannon, G.J. (2013). A transcriptome-wide RNAi screen in the  
744 *Drosophila* ovary reveals factors of the germline piRNA pathway. *Mol Cell* 50, 749-761.
- 745 Dalmay, T., Hamilton, A., Rudd, S., Angell, S., and Baulcombe, D.C. (2000). An RNA-Dependent RNA  
746 polymerase gene in *Arabidopsis* is required for posttranscriptional gene silencing mediated by a  
747 transgene but not by a virus. *Cell* 101, 543-553.
- 748 Daniels, S.B., Peterson, K.R., Strausbaugh, L.D., Kidwell, M.G., and Chovnick, A. (1990). Evidence for  
749 Horizontal Transmission of the P-Transposable Element between *Drosophila* Species. *Genetics*  
750 124, 339-355.
- 751 De Cecco, M., Steve W. Criscione, Abigal L. Peterson, Nicola Neretti, John M. Sedivy, and Jill A.  
752 Kreiling (2013a). Genomes of replicatively senescent cells undergo global epigenetic changes  
753 leading to gene silencing and activation of transposable elements. *Aging Cell* 12, 247-256.
- 754 De Cecco, M., Steve W. Criscione, Abigal L. Peterson, Nicola Neretti, John M. Sedivy, and Jill A.  
755 Kreiling (2013b). Transposable elements become activate and mobile in the genomes of aging  
756 mammalian somatic tissues. *AGING* 5, 17.
- 757 de Vanssay, A., Bouge, A.L., Boivin, A., Hermant, C., Teyssset, L., Delmarre, V., Antoniewski, C., and  
758 Ronsseray, S. (2012). Paramutation in *Drosophila* linked to emergence of a piRNA-producing  
759 locus. *Nature* 490, 112-115.

- 760 Dion-Cote, A.M., Renaut, S., Normandeau, E., and Bernatchez, L. (2014). RNA-seq reveals  
761 transcriptomic shock involving transposable elements reactivation in hybrids of young lake  
762 whitefish species. *Mol Biol Evol* 31, 1188-1199.
- 763 Doroszuk, A. (2012). Transcriptome analysis of a long-lived natural *Drosophila* variant: a prominent role  
764 of stress and reproduction genes in lifespan extension. *BMC Genomics* 13.
- 765 *Drosophila* 12 Genomes, C., Clark, A.G., Eisen, M.B., Smith, D.R., Bergman, C.M., Oliver, B., Markow,  
766 T.A., Kaufman, T.C., Kellis, M., Gelbart, W., et al. (2007). Evolution of genes and genomes on  
767 the *Drosophila* phylogeny. *Nature* 450, 203-218.
- 768 Dunson, D., Colombo, B., and Baird, D. (2002). Changes with age in the level and duration of fertility in  
769 the menstrual cycle. *Human Reproduction* 17, 1399-1403.
- 770 Eden, E., Navon, R., Steinfeld, I., Lipson, D., and Yakhini, Z. (2009). GOrilla: a tool for discovery and  
771 visualization of enriched GO terms in ranked gene lists. *BMC Bioinformatics* 10, 48.
- 772 Eggleston, W.B., Johnson-Schlitz, D.M., and Engels, W.R. (1988). P-M hybrid dysgenesis does not  
773 mobilize other transposable element families in *D. melanogaster*. *Nature* 331, 368-370.
- 774 Erwin, A.A., Galdos, M.A., Wickersheim, M.L., Harrison, C.C., Marr, K.D., Colicchio, J.M., and  
775 Blumenstiel, J.P. (2015). piRNAs Are Associated with Diverse Transgenerational Effects on  
776 Gene and Transposon Expression in a Hybrid Dysgenic Syndrome of *D. virilis*. *PLoS Genet* 11,  
777 e1005332.
- 778 Evgen'ev, M.B. (2013). What happens when Penelope comes?: An unusual retroelement invades a host  
779 species genome exploring different strategies. *Mob Genet Elements* 3, e24542.
- 780 Evgen'ev, M.B., and Arkhipova, I.R. (2005). Penelope-like elements--a new class of retroelements:  
781 distribution, function and possible evolutionary significance. *Cytogenet Genome Res* 110, 510-  
782 521.
- 783 Evgenev, M.B., Zelentsova, H., Shostak, N., Kozitsina, M., Barskyi, V., Lankenau, D.H., and Corces,  
784 V.G. (1997). Penelope, a new family of transposable elements and its possible role in hybrid

- 785 dysgenesis in *Drosophila virilis*. Proceedings of the National Academy of Sciences of the United  
786 States of America 94, 196-201.
- 787 Fernandez-Silva SP, P.V., Fracasso F, Gadaleta MN, Cantatore P (1991). Reduced synthesis of mtRNA in  
788 isolated mitochondria of senescent rat brain. Biochemical and Biophysical Research  
789 Communications 176, 645-653.
- 790 Figueroa-Romero, C., Hur, J., Bender, D.E., Delaney, C.E., Cataldo, M.D., Smith, A.L., Yung, R., Ruden,  
791 D.M., Callaghan, B.C., and Feldman, E.L. (2012). Identification of epigenetically altered genes in  
792 sporadic amyotrophic lateral sclerosis. PLoS One 7, e52672.
- 793 Futschik, M., and Carlisle, B. (2005). Noise-robust soft clustering of gene expression time-course data.  
794 Journal of Bioinformatics and Computational Biology 3.
- 795 Gates, M.A., Kannan, R., and Giniger, E. (2011). A genome-wide analysis reveals that the *Drosophila*  
796 transcription factor Lola promotes axon growth in part by suppressing expression of the actin  
797 nucleation factor Spire. Neural Dev 6, 37.
- 798 Gerasimova, T., Mizrokhi, L., and Georgiev, G. (1984). Transposition bursts in genetically unstable  
799 *Drosophila melanogaster*. Nature 309, 714-716.
- 800 Ghildiyal, M., Setiz, H., Horwich, M., Li, C., Du, T., Lee, S., Xu, J., Kittler, E., Zapp, M., Weng, Z., et al.  
801 (2008). Endogenous siRNAs Derived from Transposons and mRNAs in *Drosophila* Somatic  
802 Cells. Science 320
- 803 .
- 804 Gibson, G., Riley-Berger, R., Harshman, L., Kopp, A., Vacha, S., Nuzhdin, S., and Wayne, M. (2004).  
805 Extensive sex-specific nonadditivity of gene expression in *Drosophila melanogaster*. Genetics  
806 167, 1791-1799.
- 807 Girardot, F., Lasbleiz, C., Monnier, V., and Tricoire, H. (2006). Specific age-related signatures in  
808 *Drosophila* body parts transcriptome. BMC Genomics 7, 69.

- 809 Gou, L.T., Dai, P., Yang, J.H., Xue, Y., Hu, Y.P., Zhou, Y., Kang, J.Y., Wang, X., Li, H., Hua, M.M., et  
810 al. (2014). Pachytene piRNAs instruct massive mRNA elimination during late spermiogenesis.  
811 Cell Res 24, 680-700.
- 812 Greer, E.L., Becker, B., Latza, C., Antebi, A., and Shi, Y. (2016). Mutation of *C. elegans* demethylase  
813 spr-5 extends transgenerational longevity. Cell Res 26, 229-238.
- 814 Greer, E.L., Maures, T.J., Ucar, D., Hauswirth, A.G., Mancini, E., Lim, J.P., Benayoun, B.A., Shi, Y., and  
815 Brunet, A. (2011). Transgenerational epigenetic inheritance of longevity in *Caenorhabditis*  
816 *elegans*. Nature 479, 365-371.
- 817 Grentzinger, T., Armenise, C., Brun, C., Mugat, B., Serrano, V., Pelisson, A., and Chambeyron, S.  
818 (2012). piRNA-mediated transgenerational inheritance of an acquired trait. Genome Res 22,  
819 1877-1888.
- 820 Gu, T., and Elgin, S.C. (2013). Maternal depletion of Piwi, a component of the RNAi system, impacts  
821 heterochromatin formation in *Drosophila*. PLoS Genet 9, e1003780.
- 822 Gunawardane, L.S., Saito, K., Nishida, K.M., Miyoshi, K., Kawamura, Y., Nagami, T., Siomi, H., and  
823 Siomi, M.C. (2007). A slicer-mediated mechanism for repeat-associated siRNA 5' end formation  
824 in *Drosophila*. Science 315, 1587-1590.
- 825 Haynes, K.A., Caudy, A.A., Collins, L., and Elgin, S.C.R. (2006). Element 1360 and RNAi components  
826 contribute to HP1-dependent silencing of a pericentric reporter. Current Biology 16, 2222-2227.
- 827 Hazelrigg, T., Watkins, W., Marcey, D., Tu, C., Karow, M., and Xiaorong, L. (1990). The exuperantia  
828 gene is required for *Drosophila* spermatogenesis as well as anteroposterior polarity of the  
829 developing oocyte, and encodes overlapping sex-specific transcripts. Genetics, 607-617.
- 830 Hickey, D.A. (1982). Selfish DNA: A sexually-transmitted nuclear parasite. Genetics 101, 519-531.
- 831 Highfill, C.A., Reeves, G.A., and Macdonald, S.J. (2016). Genetic analysis of variation in lifespan using a  
832 multiparental advanced intercross *Drosophila* mapping population. BMC Genet 17, 113.
- 833 Hsu, H., and Drummond-Barbosa, D. (2008). Insulin levels control female germline stem cell  
834 maintenance via the niche in *Drosophila*. PNAS 106, 1117-1121.



- 835 Ivanov, D.K., Escott-Price, V., Ziehm, M., Magwire, M.M., Mackay, T.F., Partridge, L., and Thornton,  
836 J.M. (2015). Longevity GWAS Using the Drosophila Genetic Reference Panel. *J Gerontol A Biol*  
837 *Sci Med Sci* 70, 1470-1478.
- 838 Jiang, N., Guyu Du, Ethan Tobias, Jason G. Wood, Rachel Whitaker, Nicola Neretti, and Stephen L.  
839 Helfand (2013). Dietary and genetic effects on age-related loss of gene silencing reveal epigenetic  
840 plasticity of chromatin repression during aging. *Aging* 5.
- 841 Johnson, M.T., Freeman, E.A., Gardner, D.K., and Hunt, P.A. (2007). Oxidative metabolism of pyruvate  
842 is required for meiotic maturation of murine oocytes in vivo. *Biol Reprod* 77, 2-8.
- 843 Jones, B.C., Wood, J.G., Chang, C., Tam, A.D., Franklin, M.J., Siegel, E.R., and Helfand, S.L. (2016). A  
844 somatic piRNA pathway in the Drosophila fat body ensures metabolic homeostasis and normal  
845 lifespan. *Nat Commun* 7, 13856.
- 846 Josefsson, C., Dilkes, B., and Comai, L. (2006). Parent-dependent loss of gene silencing during  
847 interspecies hybridization. *Current Biology* 16, 1322-1328.
- 848 Kelleher, E.S., Edelman, N.B., and Barbash, D.A. (2012). Drosophila interspecific hybrids phenocopy  
849 piRNA-pathway mutants. *PLoS Biol* 10, e1001428.
- 850 Kharchenko, P.V., Alekseyenko, A.A., Schwartz, Y.B., Minoda, A., Riddle, N.C., Ernst, J., Sabo, P.J.,  
851 Larschan, E., Gorchakov, A.A., Gu, T., et al. (2011). Comprehensive analysis of the chromatin  
852 landscape in *Drosophila melanogaster*. *Nature* 471, 480-485.
- 853 Khurana, J.S., Wang, J., Xu, J., Koppetsch, B.S., Thomson, T.C., Nowosielska, A., Li, C., Zamore, P.D.,  
854 Weng, Z., and Theurkauf, W.E. (2011a). Adaptation to P element transposon invasion in  
855 *Drosophila melanogaster*. *Cell* 147, 1551-1563.
- 856 Khurana, J.S., Wang, J., Xu, J., Koppetsch, B.S., Thomson, T.C., Nowosielska, A., Li, C., Zamore, P.D.,  
857 Weng, Z., and Theurkauf, W.E. (2011b). Adaptation to P Element Transposon Invasion in  
858 *Drosophila melanogaster*. *Cell* 147, 1551-1563.
- 859 Khurana, J.S., Xu, J., Weng, Z., and Theurkauf, W.E. (2010). Distinct functions for the *Drosophila*  
860 piRNA pathway in genome maintenance and telomere protection. *PLoS Genet* 6, e1001246.

- 861 Kidwell, M.G., Kidwell, J.F., and Sved, J.A. (1977). Hybrid Dysgenesis in *Drosophila melanogaster*: A  
862 Syndrome of Aberrant Traits Including Mutation, Sterility and Male Recombination. *Genetics* 86,  
863 813-833.
- 864 Kidwell, M.G., and Novy, J.B. (1979). Hybrid dysgenesis in *Drosophila melanogaster* - Sterility resulting  
865 from gonadal-dysgenesis in the P-M system. *Genetics* 92, 1127-1140.
- 866 Kolaczowski, B., Hupalo, D.N., and Kern, A.D. (2010). Recurrent Adaptation in RNA Interference  
867 Genes Across the *Drosophila* Phylogeny. *Molecular Biology and Evolution* 28, 1033-1042.
- 868 Komili, S., Farny, N.G., Roth, F.P., and Silver, P.A. (2007). Functional specificity among ribosomal  
869 proteins regulates gene expression. *Cell* 131, 557-571.
- 870 Kong, A., Frigge, M.L., Masson, G., Besenbacher, S., Sulem, P., Magnusson, G., Gudjonsson, S.A.,  
871 Sigurdsson, A., Jonasdottir, A., Jonasdottir, A., et al. (2012). Rate of de novo mutations and the  
872 importance of father's age to disease risk. *Nature* 488, 471-475.
- 873 Labrador, M., Farre, M., Utzet, F., and Fontdevila, A. (1999). Interspecific hybridization increases  
874 transposition rates of *Osvaldo*. *Mol Biol Evol* 16, 931-937.
- 875 Landis, G.N., Abdueva, D., Skvortsov, D., Yang, J., Rabin, B.E., Carrick, J., Tavaré, S., and Tower, J.  
876 (2004). Similar gene expression patterns characterize aging and oxidative stress in *Drosophila*  
877 *melanogaster*. *Proc Natl Acad Sci U S A* 101, 7663-7668.
- 878 Larson, K., Yan, S.J., Tsurumi, A., Liu, J., Zhou, J., Gaur, K., Guo, D., Eickbush, T.H., and Li, W.X.  
879 (2012). Heterochromatin formation promotes longevity and represses ribosomal RNA synthesis.  
880 *PLoS Genet* 8, e1002473.
- 881 Le Thomas, A., Marinov, G.K., and Aravin, A.A. (2014a). A transgenerational process defines piRNA  
882 biogenesis in *Drosophila virilis*. *Cell Rep* 8, 1617-1623.
- 883 Le Thomas, A., Stuwe, E., Li, S., Du, J., Marinov, G., Rozhkov, N., Chen, Y.C., Luo, Y.,  
884 Sachidanandam, R., Toth, K.F., et al. (2014b). Transgenerationally inherited piRNAs trigger  
885 piRNA biogenesis by changing the chromatin of piRNA clusters and inducing precursor  
886 processing. *Genes Dev* 28, 1667-1680.

- 887 Lee, C. (1999). Gene Expression Profile of Aging and its Retardation by Caloric Restriction. *Science*.
- 888 Lewis, S.H., Quarles, K.A., Yang, Y., Tanguy, M., Frezal, L., Smith, S.A., Sharma, P.P., Cordaux, R.,  
889 Gilbert, C., Giraud, I., et al. (2018). Pan-arthropod analysis reveals somatic piRNAs as an  
890 ancestral defence against transposable elements. *Nat Ecol Evol* 2, 174-181.
- 891 Li, C.J., Vagin, V.V., Lee, S.H., Xu, J., Ma, S.M., Xi, H.L., Seitz, H., Horwich, M.D., Syrzycka, M.,  
892 Honda, B.M., et al. (2009). Collapse of Germline piRNAs in the Absence of Argonaute3 Reveals  
893 Somatic piRNAs in Flies. *Cell* 137, 509-521.
- 894 LI, H. (2013). Aligning sequence reads, clone sequences and assembly contigs with BWA-MEM.  
895 arXivorg arXiv:1303.3997v2.
- 896 Li, H., and Durbin, R. (2010). Fast and accurate long-read alignment with Burrows-Wheeler transform.  
897 *Bioinformatics* 26, 589-595.
- 898 Li, R., Ye, J., Li, S., Wang, J., Han, Y., Ye, C., Wang, J., Yang, H., Yu, J., Wong, G.K., et al. (2005).  
899 ReAS: Recovery of ancestral sequences for transposable elements from the unassembled reads of  
900 a whole genome shotgun. *PLoS Comput Biol* 1, e43.
- 901 Li, W., Prazak, L., Chatterjee, N., Gruninger, S., Krug, L., Theodorou, D., and Dubnau, J. (2013).  
902 Activation of transposable elements during aging and neuronal decline in *Drosophila*. *Nat*  
903 *Neurosci* 16, 529-531.
- 904 Li, Y., and Tower, J. (2009). Adult-specific over-expression of the *Drosophila* genes *magu* and *hebe*  
905 increases life span and modulates late-age female fecundity. *Mol Genet Genomics* 281, 147-162.
- 906 Love, M.I., Huber, W., and Anders, S. (2014). Moderate estimation of fold change and dispersion for  
907 RNA-Seq data with DESeq2. *bioRxiv*.
- 908 Lozovskaya, E.R., Scheinker, V.S., and Evgenev, M.B. (1990). A hybrid dysgenesis syndrome in  
909 *Drosophila virilis*. *Genetics* 126, 619-623.
- 910 Lyozin, G.T., Makarova, K.S., Velikodvorskaja, V.V., Zelentsova, H.S., Khechumian, R.R., Kidwell,  
911 M.G., Koonin, E.V., and Evgen'ev, M.B. (2001). The structure and evolution of *Penelope* in the

- 912 virilis species group of *Drosophila*: an ancient lineage of retroelements. *Journal of Molecular*  
913 *Evolution* 52, 445-456.
- 914 Mackay, T.F., Richards, S., Stone, E.A., Barbadilla, A., Ayroles, J.F., Zhu, D., Casillas, S., Han, Y.,  
915 Magwire, M.M., Cridland, J.M., et al. (2012). The *Drosophila melanogaster* Genetic Reference  
916 Panel. *Nature* 482, 173-178.
- 917 Malone, C.D., Brennecke, J., Dus, M., Stark, A., McCombie, W.R., Sachidanandam, R., and Hannon, G.J.  
918 (2009). Specialized piRNA Pathways Act in Germline and Somatic Tissues of the *Drosophila*  
919 Ovary. *Cell* 137, 522-535.
- 920 Marin, L., Lehmann, M., Nouaud, D., Izaabel, H., Anxolabehere, D., and Ronsseray, S. (2000). P-element  
921 repression in *Drosophila melanogaster* by a naturally occurring defective telomeric P copy.  
922 *Genetics* 155, 1841-1854.
- 923 Maxwell, P.H., Burhans, W.C., and Curcio, M.J. (2011). Retrotransposition is associated with genome  
924 instability during chronological aging. *Proc Natl Acad Sci U S A* 108, 20376-20381.
- 925 May-Panloup, P., Chretien, M., Malthiery, Y., and Reynier, P. (2007). Mitochondrial DNA in the Oocyte  
926 and the Developing Embryo. *Current topics in developmental biology* 77C, 51-83.
- 927 McCarroll, S.A., Murphy, C.T., Zou, S., Pletcher, S.D., Chin, C.S., Jan, Y.N., Kenyon, C., Bargmann,  
928 C.I., and Li, H. (2004). Comparing genomic expression patterns across species identifies shared  
929 transcriptional profile in aging. *Nat Genet* 36, 197-204.
- 930 Mohr, S., Dillon, S., and Boswell, R. (2001). The RNA-binding protein Tsunagi interacts with Mago  
931 Nashi to establish polarity and localize oskar mRNA during *Drosophila* oogenesis. *Genes Dev* 15,  
932 2886-2899.
- 933 Morales-Hojas, R., Vieira, C.P., and Vieira, J. (2006). The evolutionary history of the transposable  
934 element Penelope in the *Drosophila virilis* group of species. *J Mol Evol* 63, 262-273.
- 935 Morel, F., Mazet, F., Touraille, S., Alziari, S. (1995). Changes in the respiratory chain complexes  
936 activities and in the mitochondrial DNA content during ageing in *D. subobscura*. *Mech Ageing*  
937 *Dev* 84, 171-181.

- 938 Mott, R., Yuan, W., Kaisaki, P., Gan, X., Cleak, J., Edwards, A., Baud, A., and Flint, J. (2014). The  
939 architecture of parent-of-origin effects in mice. *Cell* 156, 332-342.
- 940 Muntean, A., and Hess, J. (2009). Epigenetic Dysregulation in Cancer. *The American Journal of*  
941 *Pathology* 175, 1353-1361.
- 942 Niemi, J.B., Raymond, J.D., Patrek, R., and Simmons, M.J. (2004). Establishment and maintenance of the  
943 P cytotype associated with telomeric P elements in *Drosophila melanogaster*. *Genetics* 166, 255-  
944 264.
- 945 Niepielko, M.G., Marmion, R.A., Kim, K., Luor, D., Ray, C., and Yakoby, N. (2014). Chorion patterning:  
946 a window into gene regulation and *Drosophila* species' relatedness. *Mol Biol Evol* 31, 154-164.
- 947 O'Neill, R.J., O'Neill, M.J., and Graves, J.A. (1998). Undermethylation associated with retroelement  
948 activation and chromosome remodelling in an interspecific mammalian hybrid. *Nature* 393, 68-  
949 72.
- 950 O'Neill, R.J., O'Neill, M.J., and Graves, J.A. (2002). Corrigendum: Undermethylation associated with  
951 retroelement activation and chromosome remodelling in an interspecific mammalian hybrid.  
952 *Nature* 420, 106.
- 953 Obbard, D.J., Gordon, K.H.J., Buck, A.H., and Jiggins, F.M. (2009). The evolution of RNAi as a defence  
954 against viruses and transposable elements. *Philosophical Transactions of the Royal Society B-*  
955 *Biological Sciences* 364, 99-115.
- 956 Obbard, D.J., Maclennan, J., Kim, K.W., Rambaut, A., O'Grady, P.M., and Jiggins, F.M. (2012).  
957 Estimating divergence dates and substitution rates in the *Drosophila* phylogeny. *Mol Biol Evol*  
958 29, 3459-3473.
- 959 Olovnikov, I., Ryazansky, S., Shpiz, S., Lavrov, S., Abramov, Y., Vaury, C., Jensen, S., and Kalmykova,  
960 A. (2013). De novo piRNA cluster formation in the *Drosophila* germ line triggered by transgenes  
961 containing a transcribed transposon fragment. *Nucleic Acids Res* 41, 5757-5768.
- 962 Pan, L., Chen, S., Weng, C., Call, G., Zhu, D., Tang, H., Zhang, N., and Xie, T. (2007). Stem cell aging is  
963 controlled both intrinsically and extrinsically in the *Drosophila* ovary. *Cell Stem Cell* 1, 458-469.

- 964 Paris, M., Villalta, J.E., Eisen, M.B., and Lott, S.E. (2015). Sex Bias and Maternal Contribution to Gene  
965 Expression Divergence in *Drosophila* Blastoderm Embryos. *PLoS Genet* 11, e1005592.
- 966 Parisi, M.J., Gupta, V., Sturgill, D., Warren, J.T., Jallon, J.M., Malone, J.H., Zhang, Y., Gilbert, L.I., and  
967 Oliver, B. (2010). Germline-dependent gene expression in distant non-gonadal somatic tissues of  
968 *Drosophila*. *BMC Genomics* 11, 346.
- 969 Parisi, M.J., Nutall, R., Edwards, P., Minor, J., Naiman, D., Lu, J., Doctolero, M., Vainer, M., Chan, C.,  
970 Malley, J., et al. (2004). A survey ovary-, testis-, and soma-biased gene expression in *Drosophila*  
971 *melanogaster* adults. *Genome Biology* 5.
- 972 Parma, D.H., Bennett, P.E., Jr., and Boswell, R.E. (2007). Mago Nashi and Tsunagi/Y14, respectively,  
973 regulate *Drosophila* germline stem cell differentiation and oocyte specification. *Dev Biol* 308,  
974 507-519.
- 975 Patterson, M.N., Scannapieco, A.E., Au, P.H., Dorsey, S., Royer, C.A., and Maxwell, P.H. (2015).  
976 Preferential retrotransposition in aging yeast mother cells is correlated with increased genome  
977 instability. *DNA Repair (Amst)* 34, 18-27.
- 978 Pavlidis, P., Jensen, J.D., Stephan, W., and Stamatakis, A. (2012). A critical assessment of storytelling:  
979 gene ontology categories and the importance of validating genomic scans. *Mol Biol Evol* 29,  
980 3237-3248.
- 981 Perrat, P., DasGupta, S., Wang, J., Theurkauf, W., Weng, Z., Rosbash, M., and Waddell, S. (2013).  
982 Transposition-Driven Genomic Heterogeneity in the *Drosophila* Brain. *Science* 340.
- 983 Petrov, D.A., Schutzman, J.L., Hartl, D.L., and Lozovskaya, E.R. (1995). Diverse transposable elements  
984 are mobilized in hybrid dysgenesis in *Drosophila virilis* *Proceedings of the National Academy of*  
985 *Sciences of the United States of America* 92, 8050-8054.
- 986 Pletcher, S.D. (2002). Genome-Wide Transcript Profiles in Aging and Calorically Restricted *Drosophila*  
987 *melanogaster*. *Current Biology* 12, 712-723.
- 988 Putiri, E.L., and Robertson, K.D. (2011). Epigenetic mechanisms and genome stability. *Clin Epigenetics*  
989 2, 299-314.

- 990 Quinlan, A.R., and Hall, I.M. BEDTools: a flexible suite of utilities for comparing genomic features.  
991 *Bioinformatics* 26, 841-842.
- 992 Rahman, R., Chirn, G.W., Kanodia, A., Sytnikova, Y.A., Brembs, B., Bergman, C.M., and Lau, N.C.  
993 (2015). Unique transposon landscapes are pervasive across *Drosophila melanogaster* genomes.  
994 *Nucleic Acids Res* 43, 10655-10672.
- 995 Rajasethupathy, P., Antonov, I., Sheridan, R., Frey, S., Sander, C., Tuschl, T., and Kandel, E.R. (2012). A  
996 role for neuronal piRNAs in the epigenetic control of memory-related synaptic plasticity. *Cell*  
997 149, 693-707.
- 998 Riechmann, V., and Ephrussi, A. (2004). Par-1 regulates bicoid mRNA localisation by phosphorylating  
999 *Exuperantia*. *Development* 131, 5897-5907.
- 1000 Ronsseray, S., Josse, T., Boivin, A., and Anxolabehere, D. (2003). Telomeric transgenes and trans-  
1001 silencing in *Drosophila*. *Genetica* 117, 327-335.
- 1002 Ronsseray, S., Marin, L., Lehmann, M., and Anxolabehere, D. (1998). Repression of hybrid dysgenesis in  
1003 *Drosophila melanogaster* by combinations of telomeric P-element reporters and naturally  
1004 occurring P elements. *Genetics* 149, 1857-1866.
- 1005 Rouget, C., Papin, C., Boureux, A., Meunier, A.C., Franco, B., Robine, N., Lai, E.C., Pelisson, A., and  
1006 Simonelig, M. (2010). Maternal mRNA deadenylation and decay by the piRNA pathway in the  
1007 early *Drosophila* embryo. *Nature* 467, 1128-1132.
- 1008 Rozhkov, N.V., Aravin, A.A., Zelentsova, E.S., Schostak, N.G., Sachidanandam, R., McCombie, W.R.,  
1009 Hannon, G.J., and Evgen'ev, M.B. (2010). Small RNA-based silencing strategies for transposons  
1010 in the process of invading *Drosophila* species. *Rna-a Publication of the Rna Society* 16, 1634-  
1011 1645.
- 1012 Rozhkov, N.V., Schostak, N.G., Zelentsova, E.S., Yushenova, I.A., Zatsepina, O.G., and Evgen'ev, M.B.  
1013 (2013). Evolution and dynamics of small RNA response to a retroelement invasion in *Drosophila*.  
1014 *Mol Biol Evol* 30, 397-408.

- 1015 Rozhkov, N.V., Zelentsova, E.S., Shostak, N.G., and Evgen'ev, M.B. (2011). Expression of *Drosophila*  
1016 virilis retroelements and role of small RNAs in their intrastrain transposition. *PLoS One* 6,  
1017 e21883.
- 1018 Ryu, B.Y., Orwig, K.E., Oatley, J.M., Avarbock, M.R., and Brinster, R.L. (2006). Effects of aging and  
1019 niche microenvironment on spermatogonial stem cell self-renewal. *Stem Cells* 24, 1505-1511.
- 1020 Savitsky, M., Kwon, D., Georgiev, P., Kalmykova, A., and Gvozdev, V. (2006). Telomere elongation is  
1021 under the control of the RNAi-based mechanism in the *Drosophila* germline. *Genes &*  
1022 *Development* 20, 345-354.
- 1023 Scheinker, V.S., Lozovskaya, E.R., Bishop, J.G., Corces, V.G., and Evgenev, M.B. (1990). A long  
1024 terminal repeat-containing retrotransposon in mobilized during hybrid dysgenesis in *Drosophila*  
1025 virilis. . *Proceedings of the National Academy of Sciences of the United States of America* 87,  
1026 9615-9619.
- 1027 Schmidt, J.A., Abramowitz, L.K., Kubota, H., Wu, X., Niu, Z., Avarbock, M.R., Tobias, J.W.,  
1028 Bartolomei, M.S., and Brinster, R.L. (2011). In vivo and in vitro aging is detrimental to mouse  
1029 spermatogonial stem cell function. *Biol Reprod* 84, 698-706.
- 1030 Sentmanat, M.F., and Elgin, S.C. (2012). Ectopic assembly of heterochromatin in *Drosophila*  
1031 melanogaster triggered by transposable elements. *Proc Natl Acad Sci U S A* 109, 14104-14109.
- 1032 Sese, M., Corominas, M., Stocker, H., Heino, T.I., Hafen, E., and Serras, F. (2006). The Cdi/TESK1  
1033 kinase is required for Sevenless signaling and epithelial organization in the *Drosophila* eye. *J Cell*  
1034 *Sci* 119, 5047-5056.
- 1035 Shah, P.P., Donahue, G., Otte, G.L., Capell, B.C., Nelson, D.M., Cao, K., Aggarwala, V., Cruickshanks,  
1036 H.A., Rai, T.S., McBryan, T., et al. (2013). Lamin B1 depletion in senescent cells triggers large-  
1037 scale changes in gene expression and the chromatin landscape. *Genes Dev* 27, 1787-1799.
- 1038 Sharov, A.A., Falco, G., Piao, Y., Poosala, S., Becker, K.G., Zonderman, A.B., Longo, D.L.,  
1039 Schlessinger, D., and Ko, M. (2008). Effects of aging and calorie restriction on the global gene  
1040 expression profiles of mouse testis and ovary. *BMC Biol* 6, 24.



- 1041 Shpiz, S., Olovnikov, I., Sergeeva, A., Lavrov, S., Abramov, Y., Savitsky, M., and Kalmykova, A.  
1042 (2011). Mechanism of the piRNA-mediated silencing of *Drosophila* telomeric retrotransposons.  
1043 *Nucleic Acids Res* 39, 8703-8711.
- 1044 Shpiz, S., Ryazansky, S., Olovnikov, I., Abramov, Y., and Kalmykova, A. (2014). Euchromatic  
1045 transposon insertions trigger production of novel Pi- and endo-siRNAs at the target sites in the  
1046 *drosophila* germline. *PLoS Genet* 10, e1004138.
- 1047 Sienski, G., Donertas, D., and Brennecke, J. (2012). Transcriptional silencing of transposons by Piwi and  
1048 maelstrom and its impact on chromatin state and gene expression. *Cell* 151, 964-980.
- 1049 Simkin, A., Wong, A., Poh, Y.P., Theurkauf, W.E., and Jensen, J.D. (2013). Recurrent and recent  
1050 selective sweeps in the piRNA pathway. *Evolution* 67, 1081-1090.
- 1051 Simmons, M.J., Ragatz, L.M., Sinclair, I.R., Thorp, M.W., Buschette, J.T., and Grimes, C.D. (2012).  
1052 Maternal enhancement of cytotype regulation in *Drosophila melanogaster* by genetic interactions  
1053 between telomeric P elements and non-telomeric transgenic P elements. *Genet Res (Camb)* 94,  
1054 339-351.
- 1055 Smith, C.D., Edgar, R.C., Yandell, M.D., Smith, D.R., Celniker, S.E., Myers, E.W., and Karpen, G.H.  
1056 (2007). Improved repeat identification and masking in Dipterans. *Gene* 389, 1-9.
- 1057 Smyth, L.J., McKay, G.J., Maxwell, A.P., and McKnight, A.J. (2014). DNA hypermethylation and DNA  
1058 hypomethylation is present at different loci in chronic kidney disease. *Epigenetics* 9, 366-376.
- 1059 Sohal, R.S., Toroser, D., Bregere, C., Mockett, R.J., and Orr, W.C. (2008). Age-related decrease in  
1060 expression of mitochondrial DNA encoded subunits of cytochrome c oxidase in *Drosophila*  
1061 *melanogaster*. *Mech Ageing Dev* 129, 558-561.
- 1062 Sokolova, M.I., Zelentsova, E.S., Shostak, N.G., Rozhkov, N.V., and Evgen'ev, M.B. (2013). Ontogenetic  
1063 consequences of dysgenic crosses in *Drosophila virilis*. *Int J Dev Biol* 57, 731-739.
- 1064 Spracklin, G., Fields, B., Wan, G., Becker, D., Wallig, A., Shukla, A., and Kennedy, S. (2017). The RNAi  
1065 Inheritance Machinery of *Caenorhabditis elegans*. *Genetics* 206, 1403-1416.

- 1066 Subramanian, V.V., and Bickel, S.E. (2008). Aging predisposes oocytes to meiotic nondisjunction when  
1067 the cohesin subunit SMC1 is reduced. *PLoS Genet* 4, e1000263.
- 1068 Sun, J., and Spradling, A.C. (2013). Ovulation in *Drosophila* is controlled by secretory cells of the female  
1069 reproductive tract. *Elife* 2, e00415.
- 1070 Titus, S., Li, F., Stobezki, R., Akula, K., Unsal, E., Jeong, K., Dickler, M., Robson, M., Moy, F.,  
1071 Goswami, S., et al. (2013). Impairment of BRCA1-related DNA double-strand break repair leads  
1072 to ovarian aging in mice and humans. *Sci Transl Med* 5, 172ra121.
- 1073 Tootle, T.L., Williams, D., Hubb, A., Frederick, R., and Spradling, A. (2011). *Drosophila* eggshell  
1074 production: identification of new genes and coordination by Pxt. *PLoS One* 6, e19943.
- 1075 Treiber, C.D., and Waddell, S. (2017). Resolving the prevalence of somatic transposition in *Drosophila*.  
1076 *Elife* 6.
- 1077 Tsuda, M., Kawaida, R., Kobayashi, K., Shinagawa, A., Sawada, T., Yamada, R., Yamamoto, K., and  
1078 Aigaki, T. (2010). POSH promotes cell survival in *Drosophila* and in human RASF cells. *FEBS*  
1079 *Lett* 584, 4689-4694.
- 1080 Vastenhouw, N.L., Fischer, S.E., Robert, V.J., Thijssen, K.L., Fraser, A.G., Kamath, R.S., Ahringer, J.,  
1081 and Plasterk, R.H. (2003). A genome-wide screen identifies 27 genes involved in transposon  
1082 silencing in *C. elegans*. *Curr Biol* 13, 1311-1316.
- 1083 Vela, D., Fontdevila, A., Vieira, C., and Garcia Guerreiro, M.P. (2014). A genome-wide survey of genetic  
1084 instability by transposition in *Drosophila* hybrids. *PLoS One* 9, e88992.
- 1085 Vieira, J., Vieira, C.P., Hartl, D.L., and Lozovskaya, E.R. (1998). Factors contributing to the hybrid  
1086 dysgenesis syndrome in *Drosophila virilis*. *Genetical Research* 71, 109-117.
- 1087 Vigneault, F., Ter-Ovanesyan, D., Alon, S., Eminaga, S., D, C.C., Seidman, J.G., Eisenberg, E., and G,  
1088 M.C. (2012). High-throughput multiplex sequencing of miRNA. *Curr Protoc Hum Genet* Chapter  
1089 11, Unit 11 12 11-10.

- 1090 Vinoth, K., Heng, B., Poonepalli, A., Banergee, B., Balakrishnan, L., Lu, K., Hande, M., and Cao, T.  
1091 (2008). Human Embryonic Stem Cells May Display Higher Resistance to Genotoxic Stress As  
1092 Compared to Primary Explanted Somatic Cells. *Stem Cells and Development* 17, 599-607.
- 1093 Wang, H.D., Kazemi-Esfarjani, P., and Benzer, S. (2004). Multiple-stress analysis for isolation of  
1094 *Drosophila* longevity genes. *Proc Natl Acad Sci U S A* 101, 12610-12615.
- 1095 Wang, S., and Hazelrigg, T. (1994). Implications for bcd mRNA localization from spatial distribution of  
1096 exu protein in *Drosophila* oogenesis. *Nature* 369, 400-403.
- 1097 Wittkopp, P.J., Haerum, B.K., and Clark, A.G. (2006). Parent-of-origin effects on mRNA expression in  
1098 *Drosophila melanogaster* not caused by genomic imprinting. *Genetics* 173, 1817-1821.
- 1099 Wood, J.G., Hillenmeyer, S., Lawrence, C., Chang, C., Hosier, S., Lightfoot, W., Mukherjee, E., Jiang,  
1100 N., Schorl, C., Brodsky, A.S., et al. (2010). Chromatin remodeling in the aging genome of  
1101 *Drosophila*. *Aging Cell* 9, 971-978.
- 1102 Wright, W., Piatyszek, M., Rainey, W., Byrd, W., and Shay, J. (1996). Telomerase Activity in Human  
1103 Germline and Embryonic Tissues and Cells. *Developmental Genetics* 18, 173-179.
- 1104 Yakoby, N., Bristow, C.A., Gong, D., Schafer, X., Lembong, J., Zartman, J.J., Halfon, M.S., Schupbach,  
1105 T., and Shvartsman, S.Y. (2008). A combinatorial code for pattern formation in *Drosophila*  
1106 oogenesis. *Dev Cell* 15, 725-737.
- 1107 Yang, S.A., Wang, W.D., Chen, C.T., Tseng, C.Y., Chen, Y.N., and Hsu, H.J. (2013). FOXO/Fringe is  
1108 necessary for maintenance of the germline stem cell niche in response to insulin insufficiency.  
1109 *Dev Biol* 382, 124-135.
- 1110 Yannopoulos, G., Stamatis, N., Monastirioti, M., Hatzopoulos, P., and Louis, C. (1987). *hobo* is  
1111 responsible for the induction of hybrid dysgenesis by strains of *Drosophila melanogaster* bearing  
1112 the male recombination factor 23.5MRF. *Cell* 49, 487-495.
- 1113 Zenk, F., Loeser, E., Schiavo, R., Kilpert, F., Bogdanovic, O., and Iovino, N. (2017). Germ line-inherited  
1114 H3K27me3 restricts enhancer function during maternal-to-zygotic transition. *Developmental*  
1115 *Biology* 357, 212-216.

- 1116 Zhan, M., Yamaza, H., Sun, Y., Sinclair, J., Li, H., and Zou, S. (2007). Temporal and spatial  
1117 transcriptional profiles of aging in *Drosophila melanogaster*. *Genome Res* 17, 1236-1243.
- 1118 Zhang, D., Keilty, D., Zhang, Z., and Chian, R. (2017). Mitochondria in oocyte aging: current  
1119 understanding. *Facts Views Vis OBGYN* 9, 29-38.
- 1120 Zhang, F., Wang, J., Xu, J., Zhang, Z., Koppetsch, B.S., Schultz, N., Vreven, T., Meignin, C., Davis, I.,  
1121 Zamore, P.D., et al. (2012). UAP56 couples piRNA clusters to the perinuclear transposon  
1122 silencing machinery. *Cell* 151, 871-884.
- 1123 Zhang, X., Ebata, K.T., Robaire, B., and Nagano, M.C. (2006). Aging of male germ line stem cells in  
1124 mice. *Biol Reprod* 74, 119-124.
- 1125 Zhang, Y., and Lu, H. (2009). Signaling to p53: ribosomal proteins find their way. *Cancer Cell* 16, 369-  
1126 377.
- 1127 Zhao, R., Xuan, Y., Li, X., and Xi, R. (2008). Age-related changes of germline stem cell activity, niche  
1128 signaling activity and egg production in *Drosophila*. *Aging Cell* 7, 344-354.
- 1129 Zou, S., Meadows, S., Sharp, L., Jan, L.Y., and Jan, Y.N. (2000). Genome-wide study of aging and  
1130 oxidative stress response in *Drosophila melanogaster*. *Proc Natl Acad Sci U S A* 97, 13726-  
1131 13731.
- 1132
